# Supplementary material for: Spatial aggregation methods for interpreting wastewater concentrations at jurisdictional scales: Insights from two SARS-CoV-2 monitoring programs
Source: Research Square preprint supplement (doi:10.21203/rs.3.rs-8205614/v1), 2025-12-03
Supplement: Supplementary file 1 [file 865d9f82b5c03bb3f844ac17.pdf]

# Supporting Information

## **Spatial aggregation methods for interpreting wastewater concentrations at jurisdictional scales: Insights from two SARS-CoV-2 monitoring programs**

*Elana M. G. Chan<sup>1</sup>, Elisabeth Burnor<sup>2</sup>, Alessandro Zulli<sup>1,3</sup>, Chunye Lu<sup>4</sup>, Alexander T. Yu<sup>2</sup>, Alexandria B. Boehm<sup>1\*</sup>*

<sup>1</sup> Department of Civil and Environmental Engineering, Stanford University School of Engineering and Doerr School of Sustainability, Stanford, California 94305, United States

<sup>2</sup> California Department of Public Health, Center for Infectious Diseases, Richmond, California, 94804, United States

<sup>3</sup> Division of Infectious Diseases and Geographic Medicine, Stanford University School of Medicine, Stanford, California 94305, United States

<sup>4</sup> California Department of Public Health, Center for Laboratory Sciences, Richmond, California, 94804, United States

\*Email: [aboehm@stanford.edu](mailto:aboehm@stanford.edu)

---

### Table of contents

|                                                                                     |    |
|-------------------------------------------------------------------------------------|----|
| Further details: Wastewater treatment plants in the two monitoring programs         | 2  |
| Further details: California, multi-laboratory wastewater monitoring program methods | 33 |
| Further details: Wastewater Viral Activity Level (WVAL)                             | 37 |
| Weekly COVID-19 test positivity and wastewater SARS-CoV-2 metrics: HHS regions      | 38 |
| Kendall's tau correlation results                                                   | 48 |
| Supplementary analysis: Flowpop normalization                                       | 53 |
| References                                                                          | 56 |

## Further details: Wastewater treatment plants in the two monitoring programs

**Table S1** and **Table S2** list the WWTPs in the national, single laboratory monitoring program and California, multi-laboratory monitoring program, respectively. Data in **Table S1** are provided and described in a data descriptor by Boehm et al. [1]. As stated in the main text, we included wastewater concentrations obtained from WWTPs. Thus, we excluded samples collected from Codiga, Stanford, CA and South San Diego, CA as they represent subsewershed locations within the Palo Alto WWTP and San Diego WWTP service areas, respectively. We obtained the population of each state from the US Census Bureau [2]. The HHS region of each state is shown in **Fig. 2a**. Data in **Table S2** are provided by the California Health and Human Services Open Data Portal Wastewater Surveillance Data [3] and described in the **Supporting Information** below. We obtained the population of each county from the US Census Bureau [4].

**Table S1. Details of the wastewater treatment plants in the national, single laboratory monitoring program**

| State<br>(Population)      | Location  | Wastewater Treatment<br>Plant | Population<br>Served | First/Last<br>Sample Date | Sample<br>Count | Median<br>SARS-CoV-2 RNA<br>in gc/g (IQR) | Median PMMoV<br>RNA in gc/g<br>(IQR)            |
|----------------------------|-----------|-------------------------------|----------------------|---------------------------|-----------------|-------------------------------------------|-------------------------------------------------|
| <i>HHS Region 1</i>        |           |                               |                      |                           |                 |                                           |                                                 |
| Connecticut<br>(3,617,176) | Stamford  | Stamford, CT                  | 140,000              | 2023-10-27,<br>2024-12-27 | 172             | 106272.94<br>(46618.46,<br>221434.4)      | 336155696.42<br>(276489160.38,<br>458254321.21) |
| Maine<br>(1,395,722)       | Bangor    | Bangor, ME                    | 40,000               | 2023-05-15,<br>2024-12-26 | 227             | 43324.69 (13629.4,<br>83327.58)           | 115019041.33<br>(73965457.68,<br>176602990.04)  |
|                            | Brunswick | Brunswick, ME                 | 10,000               | 2023-01-04,<br>2024-06-27 | 212             | 80538.26<br>(34060.46,<br>171403.37)      | 139685713.44<br>(106324436.64,<br>183668034.36) |
|                            | Lewiston  | Lewiston, ME                  | 60,000               | 2023-09-14,<br>2024-12-26 | 168             | 191303.51<br>(82016.58,<br>350912.78)     | 162775224.72<br>(117574120.16,<br>209691753.14) |
|                            | Portland  | Portland, ME                  | 65,000               | 2023-01-04,<br>2024-12-27 | 222             | 114275.5<br>(62098.28,<br>249835.23)      | 180454764.32<br>(119920399.43,<br>260060962.39) |

| State<br>(Population)        | Location                    | Wastewater Treatment<br>Plant | Population<br>Served | First/Last<br>Sample Date | Sample<br>Count | Median<br>SARS-CoV-2 RNA<br>in gc/g (IQR) | Median PMMoV<br>RNA in gc/g<br>(IQR)            |
|------------------------------|-----------------------------|-------------------------------|----------------------|---------------------------|-----------------|-------------------------------------------|-------------------------------------------------|
|                              | York Beach                  | York, ME                      | 10,000               | 2023-01-18,<br>2024-06-06 | 200             | 64413.99<br>(29795.26,<br>127649.6)       | 108498977.51<br>(79515987.29,<br>158597023.05)  |
| Massachusetts<br>(7,001,399) | Boston Metropolitan<br>Area | Boston, MA                    | 2,400,000            | 2023-01-02,<br>2024-12-25 | 302             | 89837.23<br>(49211.03,<br>183621.28)      | 210265727.57<br>(158567081.04,<br>277311577.23) |
|                              | Millbury                    | Millbury, MA                  | 250,000              | 2023-02-27,<br>2024-12-26 | 265             | 134282.57<br>(53568.17,<br>330982.68)     | 146446642.47<br>(101634807.45,<br>217501771.22) |
| New Hampshire<br>(1,402,054) | Concord                     | Hall Street, Concord, NH      | 45,000               | 2023-01-03,<br>2024-06-26 | 223             | 83897.39<br>(38429.73,<br>197074.62)      | 154998520.37<br>(112009164.27,<br>214753297.31) |
|                              | Concord                     | Penacook, Concord, NH         | 4,000                | 2023-01-03,<br>2024-06-26 | 220             | 107979.6<br>(35087.15,<br>322016.6)       | 164052054.09<br>(114887681.9,<br>238852130.88)  |
|                              | Dover                       | Dover, NH                     | 30,000               | 2023-01-03,<br>2024-12-24 | 298             | 138990.7<br>(65406.49,<br>303142.1)       | 149039933.66<br>(99021146.66,<br>223619019.22)  |
| Vermont<br>(647,464)         | Essex Junction              | Essex Junction, VT            | 30,000               | 2023-03-03,<br>2024-12-27 | 274             | 119616.35<br>(56124.14,<br>207346.27)     | 255912765.2<br>(200271031.67,<br>323321210.98)  |
|                              | Montpelier                  | Montpelier, VT                | 10,100               | 2023-03-06,<br>2024-12-26 | 271             | 181605.78<br>(73124.81,<br>350786.44)     | 248487276.51<br>(175545786.71,<br>346249601.42) |
|                              | South Burlington            | South Burlington, VT          | 16,000               | 2023-03-21,<br>2024-12-26 | 168             | 107664.3<br>(42884.16,<br>235442.15)      | 249703911.34<br>(197210000.49,<br>313690564.73) |

| State<br>(Population)     | Location    | Wastewater Treatment<br>Plant | Population<br>Served | First/Last<br>Sample Date | Sample<br>Count | Median<br>SARS-CoV-2 RNA<br>in gc/g (IQR) | Median PMMoV<br>RNA in gc/g<br>(IQR)            |
|---------------------------|-------------|-------------------------------|----------------------|---------------------------|-----------------|-------------------------------------------|-------------------------------------------------|
| <i>HHS Region 2</i>       |             |                               |                      |                           |                 |                                           |                                                 |
| New Jersey<br>(9,290,841) | Belmar      | Belmar, NJ                    | 52,672               | 2023-05-24,<br>2024-12-26 | 309             | 47557.89<br>(24121.02,<br>124611.24)      | 220977380.13<br>(163503883,<br>309242474.24)    |
|                           | Bridgeton   | Bridgeton, NJ                 | 50,000               | 2023-01-16,<br>2024-12-27 | 257             | 35636.25<br>(12066.07,<br>97363.7)        | 496262232.44<br>(327690516.68,<br>768789408.15) |
|                           | Bridgewater | Bridgewater, NJ               | 130,000              | 2023-01-16,<br>2024-12-27 | 234             | 79936.26<br>(36721.26,<br>183533.41)      | 195648259.94<br>(133959769.9,<br>306192918.59)  |
|                           | Newark      | Newark, NJ                    | 1,500,000            | 2023-01-02,<br>2024-12-18 | 252             | 55068.58<br>(26406.31,<br>165259.44)      | 256754446.83<br>(191355821.99,<br>326255002.65) |
|                           | Oakhurst    | Oakhurst, NJ                  | 50,000               | 2023-10-18,<br>2024-12-27 | 210             | 152241.11<br>(62606.85,<br>416876.26)     | 435861798.85<br>(293265162.85,<br>627235089.9)  |
|                           | Union Beach | Union Beach, NJ               | 100,000              | 2023-01-03,<br>2024-12-27 | 262             | 105249.81<br>(58696.33,<br>203441.67)     | 226243136.88<br>(169711739.6,<br>316635040.99)  |
| New York<br>(19,571,216)  | Ithaca      | Ithaca, NY                    | 90,000               | 2023-03-13,<br>2024-12-27 | 147             | 155955.47<br>(64002.89,<br>367497.87)     | 253858313.93<br>(176418205.99,<br>367467242.79) |
|                           | Oswego      | Oswego, NY                    | 30,000               | 2023-05-15,<br>2024-12-16 | 215             | 93825.5 (43910.98,<br>234693.8)           | 148168326.77<br>(107443788.58,<br>206059051.78) |
| <i>HHS Region 3</i>       |             |                               |                      |                           |                 |                                           |                                                 |

| State<br>(Population)                | Location       | Wastewater Treatment<br>Plant     | Population<br>Served | First/Last<br>Sample Date | Sample<br>Count | Median<br>SARS-CoV-2 RNA<br>in gc/g (IQR) | Median PMMoV<br>RNA in gc/g<br>(IQR)            |
|--------------------------------------|----------------|-----------------------------------|----------------------|---------------------------|-----------------|-------------------------------------------|-------------------------------------------------|
| Delaware<br>(1,031,890)              | Seaford        | Seaford, DE                       | 13,172               | 2023-01-03,<br>2024-12-23 | 295             | 23804.68<br>(13143.62,<br>57676.09)       | 310493402.06<br>(240260543.8,<br>411881072.76)  |
| District of<br>Columbia<br>(678,972) | Washington     | Blue Plains, Washington,<br>DC    | 2,000,000            | 2023-04-11,<br>2024-12-27 | 82              | 167744.46<br>(85791.46,<br>433613.66)     | 274974285.71<br>(206208161.34,<br>435071920.42) |
| Maryland<br>(6,180,253)              | Hagerstown     | Hagerstown, MD                    | 90,000               | 2023-04-28,<br>2024-12-27 | 306             | 84163.46<br>(29980.36,<br>205188.02)      | 231884670.3<br>(149010809.71,<br>350985670.26)  |
|                                      | Hollywood      | Hollywood, MD                     | 55,000               | 2023-08-28,<br>2024-12-23 | 268             | 61637.02<br>(27287.09,<br>121062.16)      | 183991986.74<br>(126476498.19,<br>274889386.79) |
| Pennsylvania<br>(12,961,683)         | Chester        | Chester, PA                       | 220,000              | 2023-07-31,<br>2024-12-26 | 276             | 55893.64<br>(25969.81,<br>115595.97)      | 182080327.09<br>(129742948.39,<br>252065131.01) |
|                                      | Harrisburg     | Harrisburg, PA                    | 125,000              | 2023-02-08,<br>2024-12-27 | 313             | 112004.75<br>(39545.23,<br>285145.05)     | 249959591.26<br>(166729382.49,<br>372091219.65) |
|                                      | State College  | University Park, PA               | 16,000               | 2023-11-12,<br>2024-06-03 | 84              | 39572.31<br>(11156.34,<br>107994.99)      | 184799573.5<br>(118056206.59,<br>304232234.1)   |
| Virginia<br>(8,715,698)              | Fredericksburg | Little Falls Run, Stafford,<br>VA | 50,000               | 2023-01-04,<br>2024-12-27 | 270             | 9294.7 (4528.63,<br>19990.56)             | 360417578.98<br>(287337804.73,<br>456825594.39) |
|                                      | Hillsville     | Hillsville, VA                    | 3,000                | 2023-01-04,<br>2024-12-23 | 230             | 2896.91 (0,<br>8895.74)                   | 155486064.55<br>(126974321.55,<br>192198327.67) |

| State<br>(Population)        | Location          | Wastewater Treatment<br>Plant    | Population<br>Served | First/Last<br>Sample Date | Sample<br>Count | Median<br>SARS-CoV-2 RNA<br>in gc/g (IQR) | Median PMMoV<br>RNA in gc/g<br>(IQR)            |
|------------------------------|-------------------|----------------------------------|----------------------|---------------------------|-----------------|-------------------------------------------|-------------------------------------------------|
|                              | Stafford          | Aquia, Stafford, VA              | 100,000              | 2023-01-03,<br>2024-12-26 | 271             | 7196.61 (4201.67,<br>14410.55)            | 365597679.46<br>(295101303.78,<br>441573882.06) |
| West Virginia<br>(1,770,071) | Wheeling          | Wheeling, WV                     | 100,000              | 2023-01-01,<br>2024-12-27 | 258             | 34582.1 (17482.11,<br>70554.19)           | 210498591.64<br>(158562514.17,<br>272198236.48) |
| <i>HHS Region 4</i>          |                   |                                  |                      |                           |                 |                                           |                                                 |
| Alabama<br>(5,108,468)       | Bessemer          | Bessemer, AL                     | 225,000              | 2023-12-17,<br>2024-06-27 | 312             | 91646.4 (44683.29,<br>220658.45)          | 259762527.65<br>(183082339.44,<br>380997450.2)  |
|                              | Birmingham        | Cahaba River,<br>Birmingham, AL  | 95,000               | 2023-03-01,<br>2024-12-18 | 281             | 72100.82<br>(34885.84,<br>193939.61)      | 303578220.63<br>(211960486.18,<br>407184470.2)  |
|                              | Birmingham        | Village Creek,<br>Birmingham, AL | 200,000              | 2023-01-02,<br>2024-06-28 | 281             | 43127.01 (13516,<br>140197.9)             | 242978407.71<br>(154417094.24,<br>349548556.8)  |
|                              | Fultondale        | Fultondale, AL                   | 77,000               | 2023-03-01,<br>2024-12-18 | 287             | 38245.92<br>(17271.82,<br>92725.84)       | 235051190.42<br>(163687662.85,<br>309564614.2)  |
|                              | Pinson            | Pinson, AL                       | 30,000               | 2023-04-10,<br>2024-12-27 | 287             | 24103.48 (7695.08,<br>63614.9)            | 176007952.07<br>(112743137.5,<br>256982204.91)  |
| Florida<br>(22,610,726)      | Altamonte Springs | Altamonte Springs, FL            | 95,000               | 2023-01-02,<br>2024-12-27 | 225             | 137138.8<br>(66411.48,<br>274340.56)      | 258337239.55<br>(171642520.54,<br>365478433.4)  |

| State<br>(Population) | Location         | Wastewater Treatment<br>Plant      | Population<br>Served | First/Last<br>Sample Date | Sample<br>Count | Median<br>SARS-CoV-2 RNA<br>in gc/g (IQR) | Median PMMoV<br>RNA in gc/g<br>(IQR)            |
|-----------------------|------------------|------------------------------------|----------------------|---------------------------|-----------------|-------------------------------------------|-------------------------------------------------|
|                       | Jupiter          | Jupiter, FL                        | 90,000               | 2023-01-02,<br>2024-12-27 | 309             | 50725.22<br>(24429.78,<br>108035.5)       | 165607344.37<br>(122854080.82,<br>220156067.03) |
|                       | Key Biscayne     | Key Biscayne, FL                   | 829,725              | 2023-01-05,<br>2024-12-27 | 269             | 57749.46<br>(36251.61,<br>109191.94)      | 149905962.34<br>(112325831.04,<br>209590691.38) |
|                       | Miami            | South Miami, FL                    | 920,528              | 2023-02-06,<br>2024-12-27 | 142             | 60233.32<br>(35380.27,<br>88977.06)       | 174232736.19<br>(128215834.34,<br>232777843)    |
|                       | North Miami      | North Miami, FL                    | 776,150              | 2023-02-13,<br>2024-12-27 | 294             | 18376.38 (9530.01,<br>38424.79)           | 125150431.71<br>(86090059,<br>172993183.37)     |
|                       | Orlando          | Eastern, Orange County,<br>FL      | 195,299              | 2023-01-04,<br>2024-06-28 | 257             | 83491.63<br>(40351.05,<br>145394.94)      | 146151869.03<br>(108358738.78,<br>205624811.76) |
|                       | Orlando          | Northwest, Orange<br>County, FL    | 66,690               | 2023-01-02,<br>2024-12-27 | 259             | 45634.33<br>(22462.38,<br>101912.64)      | 155081436.48<br>(111156432.76,<br>231177685.47) |
|                       | Orlando          | South, Orange County, FL           | 183,009              | 2023-01-22,<br>2024-12-24 | 258             | 59693.36<br>(34166.88,<br>115320.58)      | 187630187.41<br>(146633794.02,<br>252037476.8)  |
|                       | Saint Petersburg | Northeast, Saint<br>Petersburg, FL | 89,847               | 2023-01-15,<br>2023-12-28 | 198             | 101246.57<br>(48027.67,<br>227460.52)     | 178068044.42<br>(130021423.34,<br>243253327.01) |
|                       | Saint Petersburg | Northwest, Saint<br>Petersburg, FL | 94,218               | 2023-01-16,<br>2024-12-27 | 204             | 97658.55<br>(45798.56,<br>245843.36)      | 168048069.13<br>(118547731.35,<br>241039319.82) |

| State<br>(Population)   | Location         | Wastewater Treatment<br>Plant      | Population<br>Served | First/Last<br>Sample Date | Sample<br>Count | Median<br>SARS-CoV-2 RNA<br>in gc/g (IQR) | Median PMMoV<br>RNA in gc/g<br>(IQR)            |
|-------------------------|------------------|------------------------------------|----------------------|---------------------------|-----------------|-------------------------------------------|-------------------------------------------------|
|                         | Saint Petersburg | Southwest, Saint<br>Petersburg, FL | 47,790               | 2023-01-02,<br>2024-12-19 | 199             | 72666.75<br>(29069.09,<br>188799.58)      | 144480190.01<br>(108050409.6,<br>210391339.46)  |
|                         | Tallahassee      | Tallahassee, FL                    | 212,065              | 2023-01-02,<br>2024-12-19 | 220             | 134181.31<br>(42305.89,<br>284076.75)     | 215224796.33<br>(156936171.09,<br>321418968.85) |
|                         | Winter Garden    | Southwest, Orange<br>County, FL    | 50,000               | 2023-01-02,<br>2024-12-19 | 254             | 45891.56<br>(22440.38,<br>103698.8)       | 113017513.49<br>(84255041.22,<br>159849435.29)  |
| Georgia<br>(11,029,227) | Atlanta          | RM Clayton, Atlanta, GA            | 294,660              | 2023-08-07,<br>2024-12-27 | 279             | 57112.45<br>(30950.57,<br>115569.11)      | 327162617.41<br>(224600410.66,<br>456969753.32) |
|                         | Atlanta          | South River, Atlanta, GA           | 105,160              | 2023-08-07,<br>2024-12-27 | 278             | 63225.9 (28343.85,<br>142262.4)           | 198078278.7<br>(131868057.88,<br>266029075.77)  |
|                         | Atlanta          | Utoy Creek, Atlanta, GA            | 70,887               | 2023-08-07,<br>2024-12-27 | 278             | 43402.15<br>(22460.02,<br>123297.75)      | 180322958.59<br>(115279156.96,<br>257157165.2)  |
|                         | College Park     | College Park, GA                   | 73,821               | 2023-07-11,<br>2024-12-26 | 290             | 103540.3<br>(37159.57,<br>256636.96)      | 214126078.99<br>(160029699.08,<br>319597823.9)  |
|                         | Columbus         | Columbus, GA                       | 278,000              | 2023-01-02,<br>2024-12-19 | 192             | 74280.09<br>(27309.61,<br>149579.73)      | 256146657.05<br>(197389518.16,<br>331756640.99) |
|                         | Roswell          | Big Creek, Roswell, GA             | 189,593              | 2023-01-03,<br>2024-12-26 | 307             | 116658.12<br>(51597.35, 270276)           | 307798156.8<br>(211806243.32,<br>456369886.39)  |



| State<br>(Population)          | Location       | Wastewater Treatment<br>Plant | Population<br>Served | First/Last<br>Sample Date | Sample<br>Count | Median<br>SARS-CoV-2 RNA<br>in gc/g (IQR) | Median PMMoV<br>RNA in gc/g<br>(IQR)            |
|--------------------------------|----------------|-------------------------------|----------------------|---------------------------|-----------------|-------------------------------------------|-------------------------------------------------|
|                                | Roswell        | Johns Creek, Roswell, GA      | 84,486               | 2023-01-03,<br>2024-12-26 | 306             | 116756.62<br>(50479.52,<br>287899.58)     | 290895843.81<br>(193080754.69,<br>422599429.77) |
|                                | Roswell        | Little River, Roswell, GA     | 12,818               | 2023-01-03,<br>2024-12-26 | 307             | 151818.52<br>(60211.97,<br>303880.43)     | 190298570.95<br>(138749023.65,<br>255557437.38) |
| Kentucky<br>(4,526,154)        | Louisville     | Louisville, KY                | 423,913              | 2023-01-02,<br>2024-12-25 | 202             | 24140.39<br>(11431.29,<br>64813.95)       | 140683409.38<br>(114326420.94,<br>173134112.96) |
| Mississippi<br>(2,939,690)     | Gautier        | Gautier, MS                   | 19,008               | 2023-01-02,<br>2024-12-25 | 156             | 39860.88<br>(11326.81,<br>100010.53)      | 92020208.45<br>(66583532.43,<br>137687379.98)   |
|                                | Pascagoula     | Pascagoula Moss Point,<br>MS  | 34,333               | 2023-01-02,<br>2024-12-25 | 155             | 64591.17<br>(21460.86,<br>224995.34)      | 122262307.53<br>(81766469.28,<br>176263671.19)  |
| North Carolina<br>(10,835,491) | Kinston        | Kinston, NC                   | 25,000               | 2023-01-02,<br>2024-12-25 | 267             | 56921.69<br>(18374.31,<br>146197.82)      | 95286605.47<br>(67427060.09,<br>139259177.65)   |
|                                | Wilson         | Wilson, NC                    | 50,000               | 2023-01-02,<br>2024-12-25 | 188             | 32400.36 (14291.4,<br>71508.87)           | 211944638.98<br>(169381144.76,<br>259945396.62) |
|                                | Winston- Salem | Winston-Salem, NC             | 92,000               | 2023-01-03,<br>2024-12-19 | 285             | 60023.03<br>(24936.82,<br>199171.82)      | 316494899.54<br>(198495664.24,<br>507658964.97) |
| Tennessee<br>(7,126,489)       | Chattanooga    | Chattanooga, TN               | 400,000              | 2023-11-13,<br>2024-12-24 | 229             | 29355.75<br>(13739.94,<br>75095.89)       | 106048063.15<br>(77158961.34,<br>152761378.46)  |

| State<br>(Population)    | Location       | Wastewater Treatment<br>Plant   | Population<br>Served | First/Last<br>Sample Date | Sample<br>Count | Median<br>SARS-CoV-2 RNA<br>in gc/g (IQR) | Median PMMoV<br>RNA in gc/g<br>(IQR)            |
|--------------------------|----------------|---------------------------------|----------------------|---------------------------|-----------------|-------------------------------------------|-------------------------------------------------|
|                          | Memphis        | Memphis, TN                     | 300,000              | 2023-11-12,<br>2024-12-24 | 208             | 28410.16<br>(15036.19,<br>60317.52)       | 102557289.74<br>(69323930.14,<br>151422383.48)  |
| <i>HHS Region 5</i>      |                |                                 |                      |                           |                 |                                           |                                                 |
| Illinois<br>(12,549,689) | Glen Ellyn     | Glen Ellyn, IL                  | 86,000               | 2023-01-03,<br>2024-12-27 | 287             | 82052.13 (36844.3,<br>163259.52)          | 362472534.17<br>(258056330.98,<br>465864598.48) |
|                          | Wheaton        | Wheaton, IL                     | 63,000               | 2023-09-18,<br>2024-12-27 | 302             | 103816.58<br>(50045.39,<br>222913.19)     | 499256872.21<br>(374290514.87,<br>603478211.78) |
| Indiana<br>(6,862,199)   | Bloomington    | Bloomington, IN                 | 56,090               | 2023-01-04,<br>2024-12-20 | 324             | 92045.65<br>(35085.97,<br>193925.03)      | 267803997.07<br>(176927789,<br>386245654.64)    |
|                          | Carmel         | Carmel, IN                      | 86,000               | 2023-06-12,<br>2024-12-27 | 260             | 102437.67<br>(57880.4,<br>172896.04)      | 502295592.28<br>(395614870.61,<br>641297180.28) |
|                          | Jeffersonville | Downtown, Jeffersonville,<br>IN | 25,000               | 2023-07-30,<br>2024-12-26 | 306             | 77584.93<br>(36599.62,<br>171196.62)      | 182315777.11<br>(124192444.27,<br>264500560.56) |
|                          | Jeffersonville | North, Jeffersonville, IN       | 25,000               | 2023-01-03,<br>2024-12-26 | 305             | 73957.23<br>(34150.18,<br>157306.07)      | 205098355.94<br>(155034620.17,<br>291279669.87) |
|                          | South Bend     | South Bend, IN                  | 130,000              | 2023-01-02,<br>2024-12-27 | 289             | 87579.55<br>(37200.13,<br>229523.34)      | 350482289.47<br>(240230139.54,<br>539992201.85) |

| State<br>(Population)    | Location      | Wastewater Treatment<br>Plant | Population<br>Served | First/Last<br>Sample Date | Sample<br>Count | Median<br>SARS-CoV-2 RNA<br>in gc/g (IQR) | Median PMMoV<br>RNA in gc/g<br>(IQR)            |
|--------------------------|---------------|-------------------------------|----------------------|---------------------------|-----------------|-------------------------------------------|-------------------------------------------------|
| Michigan<br>(10,037,261) | Ann Arbor     | Ann Arbor, MI                 | 125,000              | 2023-01-03,<br>2024-12-19 | 307             | 143712.26<br>(66965.26,<br>306866.92)     | 357788543.73<br>(229102638.61,<br>516790649.3)  |
|                          | Jackson       | Jackson, MI                   | 90,000               | 2023-05-01,<br>2024-12-27 | 310             | 160330.24<br>(70863.73,<br>276651.26)     | 288478107.55<br>(230695997.83,<br>380759244.93) |
|                          | Jenison       | Jenison, MI                   | 75,000               | 2023-01-03,<br>2024-12-27 | 312             | 101325.62<br>(40370.81,<br>197857.93)     | 320743710.21<br>(243323621.86,<br>434199034.4)  |
|                          | Mt. Pleasant  | Mt. Pleasant, MI              | 21,690               | 2023-01-03,<br>2024-12-27 | 256             | 56321.87<br>(26305.04,<br>136744.55)      | 160475865.97<br>(94500697.44,<br>246011771.87)  |
|                          | Traverse City | Traverse City, MI             | 30,623               | 2023-01-29,<br>2024-12-26 | 294             | 109659.18<br>(52211.96,<br>254340.9)      | 211500707.77<br>(138627776.39,<br>304415449.5)  |
|                          | Warren        | Warren, MI                    | 140,000              | 2023-01-02,<br>2024-12-28 | 277             | 184362.47<br>(72298.93,<br>478732.06)     | 192826888.37<br>(135226406.52,<br>291425772.1)  |
| Minnesota<br>(5,737,915) | Mankato       | Mankato, MN                   | 70,000               | 2023-01-01,<br>2024-12-27 | 310             | 90180.92<br>(40871.09,<br>193120.24)      | 391409380.8<br>(321141706.01,<br>467240735.79)  |
|                          | Red Wing      | Red Wing, MN                  | 16,000               | 2023-01-02,<br>2024-12-27 | 255             | 111017.27<br>(45294.89,<br>211351.23)     | 407622158.5<br>(309667169.77,<br>525902732.82)  |
|                          | Rochester     | Rochester, MN                 | 120,000              | 2023-04-09,<br>2024-12-27 | 305             | 137317.2<br>(62160.45,<br>221050.51)      | 459949721.37<br>(359614218,<br>580886745.57)    |

| State<br>(Population)    | Location    | Wastewater Treatment<br>Plant   | Population<br>Served | First/Last<br>Sample Date | Sample<br>Count | Median<br>SARS-CoV-2 RNA<br>in gc/g (IQR) | Median PMMoV<br>RNA in gc/g<br>(IQR)            |
|--------------------------|-------------|---------------------------------|----------------------|---------------------------|-----------------|-------------------------------------------|-------------------------------------------------|
|                          | St. Cloud   | St. Cloud, MN                   | 120,000              | 2023-01-23,<br>2024-12-27 | 272             | 109232.64<br>(50926.64,<br>219836.58)     | 242564510.8<br>(179031178.06,<br>348745669.02)  |
| Ohio<br>(11,785,935)     | Akron       | Akron, OH                       | 365,000              | 2023-01-03,<br>2024-12-26 | 290             | 163075.05<br>(69956.59,<br>323401.06)     | 248083184.6<br>(178320182.8,<br>313631277.22)   |
|                          | Youngstown  | Youngstown, OH                  | 174,000              | 2023-01-03,<br>2024-12-26 | 308             | 87746.85<br>(36998.34,<br>189190.22)      | 186565425.83<br>(137166289.98,<br>240919658.85) |
| Wisconsin<br>(5,910,955) | Wausau      | Wausau, WI                      | 44,000               | 2023-05-08,<br>2024-12-27 | 231             | 103320.29<br>(43010.8,<br>237965.68)      | 225874859.36<br>(157585307.09,<br>360423360.88) |
| <i>HHS Region 6</i>      |             |                                 |                      |                           |                 |                                           |                                                 |
| Arkansas<br>(3,067,732)  | Harrison    | Harrison, AR                    | 15,000               | 2023-01-03,<br>2024-12-27 | 261             | 86749.54<br>(28515.48,<br>244274.27)      | 167343848.62<br>(119714974.05,<br>235249207.49) |
| Louisiana<br>(4,573,749) | New Orleans | East Bank, New Orleans,<br>LA   | 333,406              | 2023-04-03,<br>2024-12-27 | 171             | 86383.61<br>(29400.83,<br>188153.8)       | 147439364.42<br>(115137781.63,<br>208535836.49) |
|                          | New Orleans | West Bank, New Orleans,<br>LA   | 50,591               | 2023-01-06,<br>2024-12-27 | 161             | 86318.43<br>(25680.05,<br>278587.76)      | 190296465.12<br>(112241508.28,<br>289210867.57) |
| Texas<br>(30,503,301)    | Amarillo    | Hollywood Road, Amarillo,<br>TX | 60,000               | 2023-01-04,<br>2024-12-27 | 309             | 68741.4 (29847.71,<br>148751.45)          | 296551907.44<br>(198314827.94,<br>486294065.88) |

| State<br>(Population) | Location    | Wastewater Treatment<br>Plant     | Population<br>Served | First/Last<br>Sample Date | Sample<br>Count | Median<br>SARS-CoV-2 RNA<br>in gc/g (IQR) | Median PMMoV<br>RNA in gc/g<br>(IQR)               |
|-----------------------|-------------|-----------------------------------|----------------------|---------------------------|-----------------|-------------------------------------------|----------------------------------------------------|
|                       | Amarillo    | River Road, Amarillo, TX          | 140,000              | 2023-06-17,<br>2024-12-27 | 307             | 90942.24<br>(35269.06,<br>194783.9)       | 481692136.35<br>(334389333.16,<br>746818048.38)    |
|                       | Dallas      | Dallas Central, Dallas, TX        | 270,000              | 2023-04-23,<br>2024-12-27 | 207             | 91563.83<br>(44144.76,<br>182461.13)      | 681400285.75<br>(437886062.83,<br>1075866408.96)   |
|                       | Dallas      | Southside, Dallas, TX             | 421,700              | 2023-11-27,<br>2024-12-27 | 143             | 80293.99<br>(36590.57,<br>201284.3)       | 1030888439.43<br>(729126365.48,<br>1411304812.56)  |
|                       | Dallas      | White Rock Central,<br>Dallas, TX | 630,000              | 2023-11-27,<br>2024-12-27 | 211             | 62389.9 (29604.66,<br>155723.48)          | 669808225.76<br>(478349358.44,<br>915853479.62)    |
|                       | Gainesville | Gainesville, TX                   | 17,300               | 2023-01-01,<br>2024-12-24 | 291             | 44806.1 (15773.31,<br>162385.46)          | 499701334.63<br>(349437972.68,<br>732201010.21)    |
|                       | Garland     | Garland, TX                       | 200,000              | 2023-01-08,<br>2024-12-24 | 298             | 79603.64<br>(41750.04,<br>160009.71)      | 812702892.1<br>(635945476.54,<br>1017967064.24)    |
|                       | Laredo      | South, Laredo, TX                 | 120,000              | 2023-06-28,<br>2024-12-26 | 283             | 49932 (19204.61,<br>150161.09)            | 1858977475.94<br>(1216109844.84,<br>2893274231.85) |
|                       | Laredo      | Zacate Creek, Laredo, TX          | 140,000              | 2023-06-22,<br>2024-12-27 | 281             | 58148.23<br>(25047.36,<br>144845.41)      | 1562045045.5<br>(1081831829.13,<br>2384124019.32)  |
|                       | Sunnyvale   | Sunnyvale, TX                     | 186,000              | 2023-06-28,<br>2024-12-26 | 207             | 30097.48<br>(12117.22,<br>66382.72)       | 585424183.95<br>(465918292.09,<br>716064199.39)    |

| State<br>(Population) | Location          | Wastewater Treatment<br>Plant    | Population<br>Served | First/Last<br>Sample Date | Sample<br>Count | Median<br>SARS-CoV-2 RNA<br>in gc/g (IQR) | Median PMMoV<br>RNA in gc/g<br>(IQR)            |
|-----------------------|-------------------|----------------------------------|----------------------|---------------------------|-----------------|-------------------------------------------|-------------------------------------------------|
|                       | Wichita Falls, TX | Wichita Falls, TX                | 90,000               | 2023-01-03,<br>2024-12-27 | 299             | 55842.75<br>(27187.48,<br>105408.56)      | 727474636.19<br>(544844021.33,<br>916635262.56) |
|                       | Woodlands         | Woodlands SJRA WWTF<br>No. 1, TX | 65,000               | 2023-01-02,<br>2024-12-27 | 290             | 63552.69<br>(31755.44,<br>134225.75)      | 207806763.08<br>(138117319.31,<br>273447347.06) |
|                       | Woodlands         | Woodlands SJRA WWTF<br>No. 2, TX | 70,000               | 2023-01-04,<br>2024-12-27 | 290             | 54281.33<br>(24877.92,<br>157458.48)      | 196798384.18<br>(138828101.64,<br>321347400.16) |
|                       | Woodlands         | Woodlands SJRA WWTF<br>No. 3, TX | 15,000               | 2023-01-04,<br>2024-12-27 | 212             | 55148.44<br>(17883.48,<br>158491.41)      | 261136200.43<br>(167973127.31,<br>398137486.82) |
| <i>HHS Region 7</i>   |                   |                                  |                      |                           |                 |                                           |                                                 |
| Iowa (3,207,004)      | Clinton           | Clinton, IA                      | 29,300               | 2023-01-01,<br>2024-12-26 | 304             | 5734.32 (0,<br>12116.91)                  | 115763832.19<br>(88133824.32,<br>149180551.26)  |
|                       | Coralville        | Coralville, IA                   | 23,000               | 2023-01-03,<br>2024-12-27 | 296             | 206916.29<br>(86884.02,<br>440606.89)     | 338224045.37<br>(224695619.81,<br>490648004.87) |
|                       | Marshalltown      | Marshalltown, IA                 | 27,400               | 2023-02-20,<br>2024-12-27 | 294             | 62247.89<br>(23563.32,<br>125057.79)      | 585735659.72<br>(386571794.09,<br>920354885.31) |
|                       | Muscatine         | Muscatine, IA                    | 24,400               | 2023-02-20,<br>2024-12-27 | 298             | 56229.84<br>(17627.46,<br>135029.15)      | 349274283.41<br>(269089646.18,<br>445111591.36) |

| State<br>(Population)   | Location    | Wastewater Treatment<br>Plant  | Population<br>Served | First/Last<br>Sample Date | Sample<br>Count | Median<br>SARS-CoV-2 RNA<br>in gc/g (IQR) | Median PMMoV<br>RNA in gc/g<br>(IQR)              |
|-------------------------|-------------|--------------------------------|----------------------|---------------------------|-----------------|-------------------------------------------|---------------------------------------------------|
|                         | Ottumwa     | Ottumwa, IA                    | 25,529               | 2023-02-20,<br>2024-06-28 | 311             | 36533.03<br>(13420.39,<br>92942.24)       | 172622275.59<br>(125440493.83,<br>249605941.21)   |
| Kansas<br>(2,940,546)   | Kansas City | Kaw Point, Kansas City,<br>KS  | 90,000               | 2023-01-16,<br>2024-12-27 | 299             | 45125.55<br>(22043.36,<br>87754.71)       | 638204795.32<br>(503762210.98,<br>792579874.61)   |
|                         | Kansas City | P20, Kansas City, KS           | 35,000               | 2023-01-23,<br>2024-12-27 | 281             | 85875.5 (25681.29,<br>197162.02)          | 475776266.55<br>(338249747.31,<br>684071673.82)   |
|                         | Kansas City | Wolcott, Kansas City, KS       | 15,000               | 2023-01-22,<br>2024-12-26 | 285             | 136105.45<br>(48324.75,<br>301450.53)     | 313755892.08<br>(202815707.87,<br>461213277.2)    |
|                         | Lawrence    | Lawrence, KS                   | 80,000               | 2023-01-03,<br>2024-12-26 | 296             | 151238.09<br>(68813.05,<br>266906.17)     | 380407345.69<br>(296846586.26,<br>485818380.54)   |
|                         | Salina      | Salina, KS                     | 47,000               | 2023-01-03,<br>2024-12-27 | 312             | 76391.13 (37708.6,<br>152415.07)          | 1171630259.03<br>(696020519.13,<br>1971508856.04) |
| Nebraska<br>(1,978,379) | Lincoln     | Northeast, Lincoln, NE         | 60,000               | 2023-01-10,<br>2024-12-24 | 220             | 136103.65<br>(67784.87,<br>264903.78)     | 199723776.11<br>(128768190.25,<br>301974743.71)   |
|                         | Lincoln     | Theresa Street, Lincoln,<br>NE | 240,000              | 2023-01-10,<br>2024-12-24 | 220             | 92690.92<br>(46868.48,<br>213478.18)      | 230124062.37<br>(159117176.72,<br>370404781.43)   |
| HHS Region 8            |             |                                |                      |                           |                 |                                           |                                                   |

| State<br>(Population)      | Location       | Wastewater Treatment<br>Plant   | Population<br>Served | First/Last<br>Sample Date | Sample<br>Count | Median<br>SARS-CoV-2 RNA<br>in gc/g (IQR) | Median PMMoV<br>RNA in gc/g<br>(IQR)             |
|----------------------------|----------------|---------------------------------|----------------------|---------------------------|-----------------|-------------------------------------------|--------------------------------------------------|
| Colorado<br>(5,877,610)    | Parker         | North, Parker, CO               | 35,000               | 2023-01-09,<br>2024-12-24 | 288             | 109419.11<br>(60490.36,<br>208526.57)     | 310008064.81<br>(217054017.7,<br>474220647.79)   |
|                            | Parker         | South, Parker, CO               | 25,000               | 2023-01-04,<br>2024-12-27 | 285             | 90164.59<br>(47244.15,<br>183542.63)      | 274793423.35<br>(184362073.5,<br>406590351.3)    |
| South Dakota<br>(919,318)  | Yankton        | Yankton, SD                     | 20,000               | 2023-01-02,<br>2024-12-27 | 261             | 103164.37<br>(41262.81,<br>243672.8)      | 205844785.1<br>(145807091.67,<br>307530427.9)    |
| Utah (3,417,734)           | Provo          | Provo, UT                       | 115,000              | 2023-08-02,<br>2024-12-27 | 204             | 218224.2<br>(103896.84,<br>357619.24)     | 664363467.68<br>(520163841.07,<br>891159594)     |
|                            | Salt Lake City | Central Salt Lake Valley,<br>UT | 600,000              | 2023-08-02,<br>2024-12-27 | 309             | 160435.56<br>(88959.7,<br>301647.88)      | 852490441.78<br>(672037272.11,<br>1044213432.26) |
| <i>HHS Region 9</i>        |                |                                 |                      |                           |                 |                                           |                                                  |
| California<br>(38,965,193) | Carson         | Los Angeles County, CA          | 3,500,000            | 2023-01-03,<br>2024-12-26 | 312             | 118944.03<br>(57780.56,<br>234882.72)     | 1196901753.7<br>(899975727.19,<br>1643842486.96) |
|                            | Davis          | Davis, CA                       | 68,000               | 2023-04-25,<br>2024-12-27 | 303             | 85433.19<br>(44436.63,<br>158193.1)       | 587539095.5<br>(428516178.17,<br>790537467.89)   |
|                            | Esparto        | Esparto, CA                     | 4,006                | 2023-01-02,<br>2024-12-25 | 226             | 44809.41<br>(20574.95,<br>101651.59)      | 893387959.48<br>(584071934.99,<br>1474872174.55) |



| State<br>(Population) | Location      | Wastewater Treatment<br>Plant   | Population<br>Served | First/Last<br>Sample Date | Sample<br>Count | Median<br>SARS-CoV-2 RNA<br>in gc/g (IQR) | Median PMMoV<br>RNA in gc/g<br>(IQR)               |
|-----------------------|---------------|---------------------------------|----------------------|---------------------------|-----------------|-------------------------------------------|----------------------------------------------------|
|                       | Fairfield     | Fairfield, CA                   | 155,000              | 2023-01-03,<br>2024-12-27 | 233             | 85865.53<br>(53775.84,<br>157604.21)      | 813370580.84<br>(660153521.82,<br>1018997864.86)   |
|                       | Gilroy        | Gilroy, CA                      | 110,338              | 2023-01-02,<br>2024-05-31 | 728             | 59659.69<br>(30382.26,<br>111642.13)      | 515462811.68<br>(339089876.09,<br>807180481.5)     |
|                       | Half Moon Bay | Half Moon Bay, CA               | 28,000               | 2023-01-01,<br>2024-12-25 | 211             | 120459.28<br>(60583.07,<br>234988.84)     | 561828054.8<br>(350389800.34,<br>844358541.07)     |
|                       | Hollister     | Hollister, CA                   | 42,000               | 2023-01-01,<br>2024-12-27 | 211             | 133238.42<br>(45585.97,<br>322177.13)     | 1159009370.34<br>(766551431.32,<br>1715206516.31)  |
|                       | Indio         | Indio, CA                       | 91,765               | 2023-01-04,<br>2024-06-28 | 312             | 56566.27<br>(21949.71,<br>100726.9)       | 1562247396.44<br>(1195508813.99,<br>2209147176.14) |
|                       | Laguna Niguel | Coastal, Laguna Niguel,<br>CA   | 48,000               | 2023-01-02,<br>2024-06-28 | 234             | 163955.55<br>(86320.21,<br>288033.41)     | 465246805.02<br>(309023872.35,<br>698590251.38)    |
|                       | Laguna Niguel | JB Latham, Laguna<br>Niguel, CA | 120,000              | 2023-01-01,<br>2024-12-28 | 235             | 125623.3<br>(67566.42,<br>274868.35)      | 488961762.38<br>(356109859.9,<br>743421150.08)     |
|                       | Laguna Niguel | Regional, Laguna Niguel,<br>CA  | 129,000              | 2023-01-06,<br>2024-06-28 | 233             | 94880.48<br>(52474.63,<br>169463.82)      | 420544937.02<br>(318379459.28,<br>608331269.41)    |
|                       | Lancaster     | Lancaster, CA                   | 200,000              | 2023-01-02,<br>2024-06-28 | 220             | 70042.97<br>(32332.83,<br>145950.31)      | 652076652.82<br>(460563604.28,<br>928544177.27)    |

| State<br>(Population) | Location      | Wastewater Treatment<br>Plant | Population<br>Served | First/Last<br>Sample Date | Sample<br>Count | Median<br>SARS-CoV-2 RNA<br>in gc/g (IQR) | Median PMMoV<br>RNA in gc/g<br>(IQR)              |
|-----------------------|---------------|-------------------------------|----------------------|---------------------------|-----------------|-------------------------------------------|---------------------------------------------------|
|                       | Lompoc        | Lompoc, CA                    | 69,290               | 2023-01-02,<br>2024-12-27 | 309             | 141063.16<br>(48327.42,<br>331772.28)     | 869386418.33<br>(551401183.48,<br>1265596141.18)  |
|                       | Los Banos     | Los Banos, CA                 | 42,000               | 2023-01-03,<br>2024-06-28 | 226             | 64268.83<br>(25958.55,<br>144015.42)      | 1053234811.92<br>(707133821.7,<br>1635755238.93)  |
|                       | Madera        | Madera, CA                    | 67,944               | 2023-01-03,<br>2024-06-28 | 196             | 46447.03 (24675,<br>73564.58)             | 1082330488.39<br>(884223995.67,<br>1384823357.01) |
|                       | Mammoth Lakes | Mammoth, CA                   | 35,000               | 2023-01-03,<br>2024-06-28 | 175             | 130292.44<br>(45873.77,<br>287930.82)     | 733147393.62<br>(534069918.93,<br>1115690834.02)  |
|                       | Marina        | Marina, CA                    | 262,000              | 2023-01-02,<br>2024-06-27 | 290             | 122994.99<br>(66006.57,<br>241009.02)     | 1205404317.19<br>(825689088.13,<br>1883383412.12) |
|                       | Martinez      | Contra Costa County, CA       | 484,800              | 2023-01-03,<br>2024-12-27 | 213             | 158780.65<br>(96412.7,<br>234520.86)      | 725954239.02<br>(545568867.38,<br>933447055.83)   |
|                       | Merced        | Merced, CA                    | 91,000               | 2023-01-03,<br>2024-06-28 | 312             | 61696.75<br>(35244.77,<br>106850.21)      | 1166637966.12<br>(887053800,<br>1564001542.64)    |
|                       | Mill Valley   | Mill Valley, CA               | 30,000               | 2023-03-06,<br>2024-06-28 | 230             | 91569.01 (55218.9,<br>159176.54)          | 295174294.26<br>(226654703.1,<br>366510064.15)    |
|                       | Modesto       | Modesto, CA                   | 230,000              | 2023-03-15,<br>2024-06-28 | 231             | 39006.11 (0,<br>75834.2)                  | 1026806077.32<br>(741162721.15,<br>1333533488.94) |

| State<br>(Population) | Location      | Wastewater Treatment<br>Plant | Population<br>Served | First/Last<br>Sample Date | Sample<br>Count | Median<br>SARS-CoV-2 RNA<br>in gc/g (IQR) | Median PMMoV<br>RNA in gc/g<br>(IQR)               |
|-----------------------|---------------|-------------------------------|----------------------|---------------------------|-----------------|-------------------------------------------|----------------------------------------------------|
|                       | Napa          | Napa, CA                      | 83,300               | 2023-01-03,<br>2024-12-27 | 304             | 157085.06<br>(89360.01,<br>290935.01)     | 1566202388.1<br>(1222750449.59,<br>1953475571.25)  |
|                       | Novato        | Novato, CA                    | 53,000               | 2023-01-05,<br>2024-06-25 | 308             | 123939.48<br>(60360.28,<br>245560.57)     | 364759702.63<br>(272345699.73,<br>533459258.55)    |
|                       | Oakland       | Oakland, CA                   | 740,000              | 2023-01-02,<br>2024-12-27 | 233             | 85705.76<br>(44650.97,<br>145127.83)      | 503194360.28<br>(381988008.14,<br>736291823.82)    |
|                       | Ontario       | Ontario, CA                   | 890,000              | 2023-01-03,<br>2024-06-20 | 287             | 66410.7 (32921.77,<br>136143.77)          | 852414741.22<br>(655461971.93,<br>1127436866.73)   |
|                       | Pacifica      | Pacifica, CA                  | 40,000               | 2023-01-03,<br>2024-06-27 | 133             | 168177.78<br>(86351.08,<br>435500.33)     | 388382322.17<br>(238816479.32,<br>563013951.84)    |
|                       | Palo Alto     | Palo Alto, CA                 | 236,000              | 2023-01-02,<br>2024-12-27 | 727             | 170495.23<br>(88895.29,<br>294716.38)     | 788460531.25<br>(589219465.08,<br>1026411579.27)   |
|                       | Paso Robles   | Paso Robles, CA               | 31,037               | 2023-01-02,<br>2024-12-27 | 307             | 78284.32<br>(31534.49,<br>166033.38)      | 1373099797.74<br>(1067632992.03,<br>1738053828.38) |
|                       | Petaluma      | Petaluma, CA                  | 65,000               | 2023-01-03,<br>2024-06-27 | 100             | 142345.89<br>(60839.08,<br>247922.96)     | 496326729.45<br>(321192245.54,<br>707578780.09)    |
|                       | Playa Del Rey | Los Angeles, CA               | 4,000,000            | 2023-01-04,<br>2024-12-24 | 310             | 68254.39<br>(37791.53,<br>129089.74)      | 741868899.46<br>(551019890.51,<br>1128652506.09)   |

| State<br>(Population) | Location          | Wastewater Treatment<br>Plant   | Population<br>Served | First/Last<br>Sample Date | Sample<br>Count | Median<br>SARS-CoV-2 RNA<br>in gc/g (IQR) | Median PMMoV<br>RNA in gc/g<br>(IQR)              |
|-----------------------|-------------------|---------------------------------|----------------------|---------------------------|-----------------|-------------------------------------------|---------------------------------------------------|
|                       | Richmond          | West Contra Costa<br>County, CA | 100,000              | 2023-01-02,<br>2024-05-15 | 190             | 109616.18<br>(61607.69,<br>200367.84)     | 584680217.58<br>(409944469.34,<br>808118239.86)   |
|                       | Riverside         | Riverside, CA                   | 350,000              | 2023-01-01,<br>2024-12-28 | 302             | 67385.62<br>(30542.66,<br>137746.38)      | 938750745.72<br>(619867532.61,<br>1539111300.57)  |
|                       | Sacramento        | Sacramento, CA                  | 1,480,000            | 2023-01-02,<br>2024-12-26 | 727             | 134751.74<br>(73851.26,<br>220775.83)     | 780503240<br>(625605223.72,<br>982488312.15)      |
|                       | San Diego         | San Diego, CA                   | 2,200,000            | 2023-01-03,<br>2024-05-30 | 294             | 144554.93<br>(69642.06,<br>297574.04)     | 952221622.17<br>(639437471.65,<br>1412428400.34)  |
|                       | San Francisco     | Southeast San Francisco,<br>CA  | 750,000              | 2023-01-02,<br>2024-06-27 | 712             | 164185.45<br>(91108.95,<br>286285.71)     | 645458779.03<br>(478732562.72,<br>842235339.87)   |
|                       | San Francisco, CA | Oceanside, San<br>Francisco, CA | 250,000              | 2023-01-25,<br>2024-12-27 | 693             | 178137.36<br>(94059.32,<br>296035.17)     | 390919213.36<br>(282119520.43,<br>521110338.97)   |
|                       | San Jose          | San Jose, CA                    | 1,500,000            | 2023-01-01,<br>2024-12-28 | 727             | 293552.74<br>(179855.01,<br>497134.42)    | 1317509403.6<br>(1118173246.92,<br>1597463400.12) |
|                       | San Leandro       | San Leandro, CA                 | 50,000               | 2023-01-01,<br>2024-12-25 | 234             | 124206.63<br>(52736.2,<br>224169.37)      | 465701470.44<br>(289640255.53,<br>702044511.23)   |
|                       | San Mateo         | San Mateo, CA                   | 150,000              | 2023-01-04,<br>2023-03-10 | 224             | 116954.24<br>(58669.57,<br>219433.44)     | 624773958.96<br>(462888812.46,<br>809780964.29)   |

| State<br>(Population) | Location       | Wastewater Treatment<br>Plant   | Population<br>Served | First/Last<br>Sample Date | Sample<br>Count | Median<br>SARS-CoV-2 RNA<br>in gc/g (IQR) | Median PMMoV<br>RNA in gc/g<br>(IQR)               |
|-----------------------|----------------|---------------------------------|----------------------|---------------------------|-----------------|-------------------------------------------|----------------------------------------------------|
|                       | San Rafael     | Las Gallinas, San Rafael,<br>CA | 30,000               | 2023-01-01,<br>2024-12-28 | 235             | 142952.3<br>(84381.86,<br>313149.34)      | 372080467.07<br>(283991926.76,<br>527941811.21)    |
|                       | San Rafael     | San Rafael, CA                  | 104,250              | 2023-01-01,<br>2024-12-28 | 190             | 103905.62<br>(46311.96,<br>258439.16)     | 374579561.14<br>(271002459.23,<br>538351506.99)    |
|                       | Santa Cruz     | Santa Cruz County, CA           | 160,000              | 2023-01-01,<br>2024-12-28 | 231             | 106504.23<br>(62389.29,<br>203977.41)     | 399702901.97<br>(303125929.08,<br>498745476.57)    |
|                       | Santa Cruz     | Santa Cruz, CA                  | 160,000              | 2023-01-03,<br>2024-06-27 | 308             | 92025.56<br>(43834.84,<br>165244.75)      | 364444721.09<br>(272730625.21,<br>477084305.89)    |
|                       | Santa Rosa     | Santa Rosa, CA                  | 230,000              | 2023-01-02,<br>2024-06-28 | 301             | 113456.55<br>(64553.63,<br>205145.83)     | 1178346706.07<br>(962912185.63,<br>1521669284.4)   |
|                       | Sausalito      | Sausalito, CA                   | 18,000               | 2023-01-03,<br>2024-06-26 | 203             | 123603.15<br>(71892.21,<br>227187.9)      | 270202086.82<br>(186913130.49,<br>385415182.01)    |
|                       | Silicon Valley | Redwood City, CA                | 199,000              | 2023-01-02,<br>2024-12-22 | 643             | 98299.37<br>(53089.38,<br>190520.44)      | 641940926.46<br>(478689386.08,<br>861673285.27)    |
|                       | Sunnyvale      | Sunnyvale, CA                   | 153,000              | 2023-01-01,<br>2024-06-30 | 716             | 172694.91<br>(91225.41,<br>303075.97)     | 1292344884.08<br>(1022179318.23,<br>1664279553.74) |
|                       | Turlock        | Turlock, CA                     | 86,000               | 2023-01-01,<br>2024-12-26 | 312             | 35798.71<br>(18206.48,<br>78520.79)       | 387338713.89<br>(224575963.58,<br>613106908.81)    |

| State<br>(Population) | Location   | Wastewater Treatment<br>Plant | Population<br>Served | First/Last<br>Sample Date | Sample<br>Count | Median<br>SARS-CoV-2 RNA<br>in gc/g (IQR) | Median PMMoV<br>RNA in gc/g<br>(IQR)            |
|-----------------------|------------|-------------------------------|----------------------|---------------------------|-----------------|-------------------------------------------|-------------------------------------------------|
|                       | Union City | Fremont, CA                   | 229,476              | 2023-01-02,<br>2024-12-25 | 188             | 113037.7<br>(59314.26,<br>211677.16)      | 381983266.97<br>(263567823.58,<br>549363353.04) |
|                       | Union City | Newark, CA                    | 47,229               | 2023-01-03,<br>2024-06-27 | 148             | 87320.44<br>(50083.48,<br>174678.41)      | 458933034.58<br>(323360824.53,<br>668071436.09) |
|                       | Union City | Union City, CA                | 68,150               | 2023-01-01,<br>2024-12-27 | 146             | 108672.27<br>(57518.7,<br>215234.39)      | 436873934.68<br>(349628233.73,<br>564707458.45) |
|                       | Vallejo    | Vallejo, CA                   | 121,000              | 2023-01-01,<br>2024-12-28 | 312             | 128451.05<br>(57747.98,<br>290335.37)     | 651493229.87<br>(391783783.83,<br>997492099.39) |
|                       | Windsor    | Windsor, CA                   | 28,000               | 2023-01-02,<br>2024-12-27 | 215             | 125809.69<br>(61270.76,<br>247759.27)     | 575298812.6<br>(409163942.59,<br>941379738.73)  |
|                       | Winters    | Winters, CA                   | 7,286                | 2023-01-03,<br>2024-12-26 | 209             | 22580.53 (8715.43,<br>62341.5)            | 459083664.6<br>(318565005.33,<br>713518928.08)  |
|                       | Woodland   | Woodland, CA                  | 59,000               | 2023-01-03,<br>2024-06-27 | 269             | 68890.7 (39410.65,<br>142076.66)          | 706663537.4<br>(452657307.88,<br>1200776063.79) |
| Hawaii<br>(1,435,138) | Hilo       | Hilo, HI                      | 16,257               | 2023-01-03,<br>2024-06-27 | 83              | 69172.55<br>(39625.67,<br>146368.07)      | 137445826.98<br>(102259353.55,<br>177088014.21) |
|                       | Honolulu   | Honouliuli, Honolulu, HI      | 300,000              | 2023-01-03,<br>2024-12-26 | 235             | 99760.34<br>(50173.66,<br>185175.79)      | 283446727.06<br>(211232734.49,<br>401093754.37) |

| State<br>(Population) | Location  | Wastewater Treatment<br>Plant | Population<br>Served | First/Last<br>Sample Date | Sample<br>Count | Median<br>SARS-CoV-2 RNA<br>in gc/g (IQR) | Median PMMoV<br>RNA in gc/g<br>(IQR)            |
|-----------------------|-----------|-------------------------------|----------------------|---------------------------|-----------------|-------------------------------------------|-------------------------------------------------|
|                       | Honolulu  | Kailua, Honolulu, HI          | 90,000               | 2023-01-03,<br>2024-06-28 | 159             | 112870.1<br>(66681.92,<br>213903.65)      | 240037388.56<br>(168074595.63,<br>315737081.97) |
|                       | Honolulu  | Sand Island, Honolulu, HI     | 390,000              | 2023-01-04,<br>2024-06-27 | 236             | 162868.95<br>(82923.3,<br>291871.33)      | 399210071.85<br>(285656815.77,<br>527859531.63) |
|                       | Honolulu  | Wahiawa, Honolulu, HI         | 18,000               | 2023-01-02,<br>2024-12-23 | 157             | 90725.36<br>(48703.89,<br>180561.61)      | 235839795.3<br>(173433603.12,<br>299750760.24)  |
|                       | Honolulu  | Waianae, Honolulu, HI         | 44,000               | 2023-05-08,<br>2024-01-10 | 158             | 87207.85<br>(53339.77,<br>180391.68)      | 182425200.19<br>(138226414.63,<br>248187859.5)  |
| Nevada<br>(3,194,176) | Las Vegas | Las Vegas, NV                 | 990,000              | 2023-06-26,<br>2024-12-26 | 290             | 110889.3<br>(56737.52,<br>209323.26)      | 443911431.89<br>(329102871.79,<br>616292521.04) |
| <i>HHS Region 10</i>  |           |                               |                      |                           |                 |                                           |                                                 |
| Alaska (733,406)      | Anchorage | Anchorage, AK                 | 220,000              | 2023-06-26,<br>2024-06-26 | 241             | 191189.23<br>(86304.8,<br>422368.7)       | 266439301.8<br>(184907210.77,<br>396243372.29)  |
| Idaho<br>(1,964,726)  | Boise     | Lander Street, Boise, ID      | 108,556              | 2023-06-26,<br>2024-12-26 | 304             | 97563.04<br>(54826.64,<br>188263.9)       | 235462164.02<br>(163950803.65,<br>346610830.23) |
|                       | Boise     | West Boise, ID                | 186,901              | 2023-06-26,<br>2024-06-26 | 302             | 111447 (54736.14,<br>235519.19)           | 268853276.25<br>(182851768.95,<br>366125965)    |

| State<br>(Population)     | Location      | Wastewater Treatment<br>Plant | Population<br>Served | First/Last<br>Sample Date | Sample<br>Count | Median<br>SARS-CoV-2 RNA<br>in gc/g (IQR) | Median PMMoV<br>RNA in gc/g<br>(IQR)           |
|---------------------------|---------------|-------------------------------|----------------------|---------------------------|-----------------|-------------------------------------------|------------------------------------------------|
|                           | Coeur D Alene | Coeur d'Alene, ID             | 50,540               | 2023-06-26,<br>2024-06-26 | 272             | 101793.87<br>(56593.88,<br>166146.37)     | 332215842.91<br>(242766027.22,<br>430141909.3) |
| Washington<br>(7,812,880) | Snohomish     | Snohomish, WA                 | 10,150               | 2023-03-27,<br>2024-12-27 | 185             | 79165.81<br>(29639.47,<br>169575.72)      | 231008689.26<br>(149887569.4,<br>344881517.77) |

Abbreviations: IQR = interquartile range, gc/g = gene copies per gram



**Table S2. Details of the wastewater treatment plants in the California, multi-laboratory monitoring program**

| County<br>(Population)      | Wastewater Treatment<br>Plant Location          | Population<br>Served <sup>a</sup> | Laboratory 1 (gc/g)          |                 |                                              |                                                 | Laboratory 2 (gc/L)          |                 |                                              |                                            |
|-----------------------------|-------------------------------------------------|-----------------------------------|------------------------------|-----------------|----------------------------------------------|-------------------------------------------------|------------------------------|-----------------|----------------------------------------------|--------------------------------------------|
|                             |                                                 |                                   | First/Last<br>Sample<br>Date | Sample<br>Count | Median<br>SARS-CoV-2<br>RNA in gc/g<br>(IQR) | Median PMMoV<br>RNA in gc/g<br>(IQR)            | First/Last<br>Sample<br>Date | Sample<br>Count | Median<br>SARS-CoV-2<br>RNA in gc/L<br>(IQR) | Median PMMoV<br>RNA in gc/L<br>(IQR)       |
| Alameda<br>(1,663,823)      | East Bay                                        | 740,000                           | 2023-01-03,<br>2024-06-27    | 248             | 87661.8<br>(46163.2,<br>145315.37)           | 499445541.89<br>(378839088.89,<br>738629018.1)  | 2023-01-03,<br>2023-10-26    | 180             | 192267.7<br>(112373.97,<br>315734.02)        | 727086065<br>(445159384.74,<br>863310710)  |
|                             | San Leandro                                     | 50,000                            | 2023-01-03,<br>2024-06-27    | 249             | 129576.93<br>(53905.9,<br>231330.35)         | 483456356.71<br>(311235815.67,<br>716525758.32) |                              |                 |                                              |                                            |
|                             | Union City - Fremont<br>Basin                   | 229,476                           | 2023-01-03,<br>2024-12-26    | 196             | 113754.99<br>(59314.26,<br>211677.16)        | 388076298.02<br>(266246304.6,<br>559181461.16)  |                              |                 |                                              |                                            |
|                             | Union City - Newark<br>Basin                    | 47,229                            | 2023-01-03,<br>2024-06-27    | 157             | 88103.13<br>(50921.28,<br>174530.09)         | 461728588.58<br>(328513299.81,<br>673587980.76) |                              |                 |                                              |                                            |
|                             | Union City - Union Basin                        | 68,150                            | 2023-01-03,<br>2024-06-27    | 154             | 111262.08<br>(59134,<br>220812.8)            | 436873934.68<br>(351363300.38,<br>564707458.45) |                              |                 |                                              |                                            |
| Butte (213,605)             | Chico                                           | 101,299                           |                              |                 |                                              |                                                 | 2023-09-05,<br>2024-12-18    | 185             | 237957.6<br>(104711.4,<br>404658.5)          | 352848600<br>(296313630,<br>421127010)     |
|                             | Oroville                                        | 44,000                            |                              |                 |                                              |                                                 | 2023-07-24,<br>2024-12-19    | 166             | 208548.15<br>(81912.58,<br>365192.52)        | 327500830<br>(255534075,<br>420535637.5)   |
| Contra Costa<br>(1,162,648) | Central San                                     | 486,050                           | 2023-01-05,<br>2024-06-25    | 225             | 155256.34<br>(97205.2,<br>233518.04)         | 718856389.72<br>(537778458.07,<br>933447055.83) | 2023-01-02,<br>2024-12-18    | 303             | 218996.56<br>(145502.8,<br>337601.65)        | 462892890<br>(374584090,<br>537634270)     |
|                             | Delta Diablo:<br>Pittsburg/Antioch/Bay<br>Point | 218,281                           |                              |                 |                                              |                                                 | 2023-06-26,<br>2024-12-18    | 180             | 175021.05<br>(84899,<br>336783.12)           | 1082022690<br>(927145230,<br>1255206182.5) |

| County<br>(Population)     | Wastewater Treatment<br>Plant Location | Population<br>Served <sup>a</sup> | Laboratory 1 (gc/g)          |                 |                                              |                                                  | Laboratory 2 (gc/L)          |                 |                                              |                                              |
|----------------------------|----------------------------------------|-----------------------------------|------------------------------|-----------------|----------------------------------------------|--------------------------------------------------|------------------------------|-----------------|----------------------------------------------|----------------------------------------------|
|                            |                                        |                                   | First/Last<br>Sample<br>Date | Sample<br>Count | Median<br>SARS-CoV-2<br>RNA in gc/g<br>(IQR) | Median PMMoV<br>RNA in gc/g<br>(IQR)             | First/Last<br>Sample<br>Date | Sample<br>Count | Median<br>SARS-CoV-2<br>RNA in gc/L<br>(IQR) | Median PMMoV<br>RNA in gc/L<br>(IQR)         |
|                            | Richmond                               | 100,000                           | 2023-01-02,<br>2024-06-27    | 204             | 114071.05<br>(63612.26,<br>202316.67)        | 589712535.16<br>(412170141.25,<br>819317146.98)  |                              |                 |                                              |                                              |
| Del Norte<br>(27,462)      | Crescent City                          | 15,372                            |                              |                 |                                              |                                                  | 2023-10-04,<br>2024-12-18    | 122             | 140124.45<br>(61712.35,<br>231715.65)        | 189337455<br>(146419552.5,<br>229419000)     |
| Fresno<br>(1,008,280)      | Fresno                                 | 650,000                           |                              |                 |                                              |                                                  | 2023-01-01,<br>2024-12-03    | 289             | 148825<br>(92127.9,<br>226585.2)             | 594436390<br>(490946270,<br>682522720)       |
| Humboldt<br>(136,132)      | Eureka                                 | 45,000                            |                              |                 |                                              |                                                  | 2023-07-30,<br>2024-12-19    | 212             | 158179.15<br>(58368.45,<br>277360.25)        | 263027985<br>(142849952.5,<br>332240532.5)   |
| Imperial<br>(179,578)      | Calexico                               | 40,000                            |                              |                 |                                              |                                                  | 2023-01-04,<br>2023-05-31    | 108             | 209101.2<br>(143954.95,<br>349061.98)        | 2089435870<br>(1913190362.5,<br>2364325260)  |
| Kern (906,883)             | East Bakersfield                       | 169,480                           |                              |                 |                                              |                                                  | 2023-01-03,<br>2024-12-19    | 302             | 111942.9<br>(43677.33,<br>248677.33)         | 861754260<br>(738736020,<br>1059765055)      |
|                            | West Bakersfield                       | 279,023                           |                              |                 |                                              |                                                  | 2023-01-04,<br>2023-06-29    | 146             | 165272.8<br>(110133.23,<br>323385.66)        | 760234605<br>(680878035,<br>852249220)       |
| Kings (152,515)            | Hanford                                | 56,000                            |                              |                 |                                              |                                                  | 2023-08-07,<br>2024-08-07    | 133             | 54608.7<br>(28839.4,<br>100650.7)            | 413040480<br>(368703640,<br>507599010)       |
| Lake (68,024)              | Southeast                              | 13,200                            |                              |                 |                                              |                                                  | 2023-01-01,<br>2024-12-16    | 351             | 73149.1<br>(28973.85,<br>174240.25)          | 899343684.9<br>(592174145,<br>1167600540)    |
| Los Angeles<br>(9,936,690) | County                                 | 3,500,000                         | 2023-01-01,<br>2024-12-25    | 327             | 122377.41<br>(59424.17,<br>241151.06)        | 1203709090.5<br>(919293433.69,<br>1663120978.74) | 2023-01-01,<br>2024-12-18    | 357             | 96053.1<br>(48153.2,<br>170700.7)            | 1155004070<br>(1002323670,<br>1293295768.23) |

| County<br>(Population) | Wastewater Treatment<br>Plant Location | Population<br>Served <sup>a</sup> | Laboratory 1 (gc/g)          |                 |                                              |                                                   | Laboratory 2 (gc/L)          |                 |                                              |                                             |
|------------------------|----------------------------------------|-----------------------------------|------------------------------|-----------------|----------------------------------------------|---------------------------------------------------|------------------------------|-----------------|----------------------------------------------|---------------------------------------------|
|                        |                                        |                                   | First/Last<br>Sample<br>Date | Sample<br>Count | Median<br>SARS-CoV-2<br>RNA in gc/g<br>(IQR) | Median PMMoV<br>RNA in gc/g<br>(IQR)              | First/Last<br>Sample<br>Date | Sample<br>Count | Median<br>SARS-CoV-2<br>RNA in gc/L<br>(IQR) | Median PMMoV<br>RNA in gc/L<br>(IQR)        |
|                        | Lancaster                              | 200,000                           | 2023-01-02,<br>2024-06-27    | 234             | 70679.97<br>(32743.26,<br>155833.96)         | 656562903.73<br>(465503567.57,<br>977509104.56)   |                              |                 |                                              |                                             |
|                        | City - Hyperion                        | 4,000,000                         | 2023-01-02,<br>2024-12-25    | 325             | 72461.55<br>(38499.41,<br>143931.29)         | 767691681.64<br>(566638898.99,<br>1144256950.9)   | 2023-01-02,<br>2024-12-17    | 356             | 159608.3<br>(91121.65,<br>300751.82)         | 926166665<br>(805155937.5,<br>1040710402.5) |
| Madera<br>(157,243)    | Madera City                            | 67,944                            | 2023-03-06,<br>2024-06-28    | 196             | 46447.03<br>(24675,<br>73564.58)             | 1082330488.39<br>(884223995.67,<br>1384823357.01) |                              |                 |                                              |                                             |
| Marin (260,485)        | CMSA: San<br>Rafael/Larkspur           | 104,250                           | 2023-01-02,<br>2024-12-22    | 200             | 107358.79<br>(48002.63,<br>275279.32)        | 374391948.29<br>(270061618.59,<br>534825437.85)   |                              |                 |                                              |                                             |
|                        | Las Gallinas                           | 30,000                            | 2023-01-03,<br>2024-06-26    | 248             | 149286.05<br>(87911.42,<br>328980.08)        | 372120958.76<br>(285235105.34,<br>539581924.84)   |                              |                 |                                              |                                             |
|                        | Novato                                 | 53,000                            | 2023-01-02,<br>2024-12-27    | 322             | 129292.95<br>(60846.45,<br>258457.19)        | 364759702.63<br>(276291497.95,<br>525823637.04)   |                              |                 |                                              |                                             |
|                        | Sausalito                              | 18,000                            | 2023-01-03,<br>2024-06-27    | 217             | 133821.14<br>(73010.37,<br>227424.19)        | 267330447.15<br>(186842772.58,<br>383786851.13)   |                              |                 |                                              |                                             |
|                        | Mill Valley                            | 30,000                            | 2023-01-03,<br>2024-06-20    | 245             | 96201.2<br>(56687.75,<br>164465.31)          | 294067429.03<br>(223739782.28,<br>363685536.58)   |                              |                 |                                              |                                             |
| Mariposa<br>(17,130)   | El Portal: Yosemite<br>Valley/Np       | 2,200                             |                              |                 |                                              |                                                   | 2023-08-22,<br>2024-12-18    | 116             | 122653<br>(40820.52,<br>202362.35)           | 475238605<br>(342348930,<br>660767782.5)    |
| Merced<br>(282,290)    | Los Banos                              | 42,000                            | 2023-01-03,<br>2024-06-28    | 240             | 67371.77<br>(29425.67,<br>147862.82)         | 1072725189.32<br>(716649885.42,<br>1661244079.79) |                              |                 |                                              |                                             |

| County<br>(Population) | Wastewater Treatment<br>Plant Location | Population<br>Served <sup>a</sup> | Laboratory 1 (gc/g)          |                 |                                              |                                                   | Laboratory 2 (gc/L)          |                 |                                              |                                            |
|------------------------|----------------------------------------|-----------------------------------|------------------------------|-----------------|----------------------------------------------|---------------------------------------------------|------------------------------|-----------------|----------------------------------------------|--------------------------------------------|
|                        |                                        |                                   | First/Last<br>Sample<br>Date | Sample<br>Count | Median<br>SARS-CoV-2<br>RNA in gc/g<br>(IQR) | Median PMMoV<br>RNA in gc/g<br>(IQR)              | First/Last<br>Sample<br>Date | Sample<br>Count | Median<br>SARS-CoV-2<br>RNA in gc/L<br>(IQR) | Median PMMoV<br>RNA in gc/L<br>(IQR)       |
|                        | Merced                                 | 91,000                            | 2023-01-02,<br>2024-12-27    | 326             | 63897.76<br>(35700.75,<br>108154.73)         | 1166239304.61<br>(888070566.93,<br>1572579998.24) |                              |                 |                                              |                                            |
| Mono (13,219)          | Mammoth Lakes                          | 35,000                            | 2023-03-15,<br>2024-06-28    | 175             | 130292.44<br>(45873.77,<br>287930.82)        | 733147393.62<br>(534069918.93,<br>1115690834.02)  |                              |                 |                                              |                                            |
| Monterey<br>(437,609)  | Marina                                 | 262,000                           | 2023-01-03,<br>2024-12-27    | 302             | 127192.06<br>(69465.95,<br>244613.41)        | 1207584707.54<br>(826478094.76,<br>1883383412.12) |                              |                 |                                              |                                            |
| Napa (137,384)         | American Canyon                        | 20,256                            |                              |                 |                                              |                                                   | 2023-01-02,<br>2024-12-19    | 345             | 229687.1<br>(133620.74,<br>394727.6)         | 442661040<br>(343141130,<br>536581010)     |
|                        | Napa                                   | 83,300                            | 2023-01-02,<br>2024-12-27    | 317             | 165302.52<br>(90552.93,<br>316341.22)        | 1567042506.88<br>(1235244699.8,<br>1950772473.73) |                              |                 |                                              |                                            |
| Nevada<br>(102,322)    | Tahoe-Truckee                          | 50,000                            |                              |                 |                                              |                                                   | 2024-01-14,<br>2024-12-19    | 144             | 268593<br>(115401.97,<br>420169.45)          | 583336710<br>(491066682.5,<br>673772372.5) |
| Orange<br>(3,175,227)  | Laguna Niguel - Coastal                | 48,000                            | 2023-01-03,<br>2024-06-28    | 248             | 173591.66<br>(87733.5,<br>295189.89)         | 474329445.04<br>(315829708.32,<br>696351036.37)   |                              |                 |                                              |                                            |
|                        | Laguna Niguel - JB<br>Latham           | 120,000                           | 2023-01-03,<br>2024-06-28    | 249             | 143835.89<br>(71520.4,<br>292535.95)         | 509342161.43<br>(359422012.72,<br>772672896)      |                              |                 |                                              |                                            |
|                        | Laguna Niguel -<br>Regional            | 129,000                           | 2023-01-03,<br>2024-06-28    | 247             | 100221.03<br>(53910.15,<br>183241.59)        | 438725772.77<br>(322435834.34,<br>635121769.02)   |                              |                 |                                              |                                            |
|                        | Orange                                 | 1,800,000                         |                              |                 |                                              |                                                   | 2023-01-01,<br>2024-12-11    | 352             | 191738.8<br>(108957.02,<br>314901.9)         | 1093501805<br>(967279190,<br>1234975525)   |

| County<br>(Population)        | Wastewater Treatment<br>Plant Location | Population<br>Served <sup>a</sup> | Laboratory 1 (gc/g)          |                 |                                              |                                                    | Laboratory 2 (gc/L)          |                 |                                              |                                           |
|-------------------------------|----------------------------------------|-----------------------------------|------------------------------|-----------------|----------------------------------------------|----------------------------------------------------|------------------------------|-----------------|----------------------------------------------|-------------------------------------------|
|                               |                                        |                                   | First/Last<br>Sample<br>Date | Sample<br>Count | Median<br>SARS-CoV-2<br>RNA in gc/g<br>(IQR) | Median PMMoV<br>RNA in gc/g<br>(IQR)               | First/Last<br>Sample<br>Date | Sample<br>Count | Median<br>SARS-CoV-2<br>RNA in gc/L<br>(IQR) | Median PMMoV<br>RNA in gc/L<br>(IQR)      |
| Placer (406,608)              | Roseville - Southeast -<br>Dry Creek   | 108,444                           |                              |                 |                                              |                                                    | 2023-09-19,<br>2024-12-18    | 148             | 140402.25<br>(69125.18,<br>278446.93)        | 271161060<br>(203496660,<br>307600045)    |
| Plumas (19,650)               | Quincy                                 | 4,217                             |                              |                 |                                              |                                                    | 2023-01-03,<br>2024-12-17    | 153             | 53607.8 (8833.5,<br>215217.3)                | 178241260<br>(81598000,<br>263521490)     |
| Riverside<br>(2,429,487)      | Riverside                              | 350,000                           | 2023-01-25,<br>2024-12-27    | 306             | 67808.85<br>(31037.86,<br>140475.33)         | 938976387.51<br>(625262853.07,<br>1556180739.46)   |                              |                 |                                              |                                           |
|                               | Indio                                  | 91,765                            | 2023-01-02,<br>2024-12-27    | 326             | 56681.11<br>(22505.03,<br>102436.98)         | 1602590852.77<br>(1211169560.61,<br>2231487698.07) |                              |                 |                                              |                                           |
| Sacramento<br>(1,579,211)     | Sacramento                             | 1,480,000                         | 2023-01-01,<br>2024-12-28    | 797             | 139394.55<br>(78446.94,<br>222476.13)        | 790416821.96<br>(632417330.42,<br>9.95e+08)        |                              |                 |                                              |                                           |
| San Benito<br>(64,753)        | Hollister                              | 42,000                            | 2023-01-02,<br>2024-06-28    | 223             | 134793.5<br>(49216.85,<br>325693)            | 1188340502.05<br>(781797298.34,<br>1817064556.09)  |                              |                 |                                              |                                           |
| San Bernardino<br>(2,180,563) | Ontario                                | 890,000                           | 2023-01-04,<br>2024-12-24    | 301             | 71089.18<br>(36126.39,<br>148374.06)         | 854287825.92<br>(666777266.29,<br>1125864531.34)   |                              |                 |                                              |                                           |
|                               | San Bernardino                         | 325,000                           |                              |                 |                                              |                                                    | 2023-01-03,<br>2024-12-16    | 325             | 124347.4<br>(68053.2,<br>233924.5)           | 819399220<br>(671235430,<br>1008697330)   |
| San Diego<br>(3,289,701)      | San Diego                              | 2,200,000                         | 2023-01-01,<br>2024-12-25    | 309             | 150633.44<br>(78296.49,<br>304165.92)        | 951977857<br>(644988077.76,<br>1416078833.97)      | 2023-01-01,<br>2024-12-16    | 341             | 151240.5<br>(84197.6,<br>251937)             | 942867710<br>(771474500,<br>1109152120)   |
| San Francisco<br>(851,036)    | Oceanside                              | 250,000                           | 2023-01-01,<br>2024-12-28    | 758             | 181733.21<br>(97114.93,<br>301355.03)        | 389633496.95<br>(276099180.66,<br>519938730.82)    | 2023-01-01,<br>2023-06-07    | 119             | 332741<br>(197765.3,<br>456129.35)           | 463082490<br>(307505183.92,<br>562243360) |

| County<br>(Population)       | Wastewater Treatment<br>Plant Location | Population<br>Served <sup>a</sup> | Laboratory 1 (gc/g)          |                 |                                              |                                                    | Laboratory 2 (gc/L)          |                 |                                              |                                            |
|------------------------------|----------------------------------------|-----------------------------------|------------------------------|-----------------|----------------------------------------------|----------------------------------------------------|------------------------------|-----------------|----------------------------------------------|--------------------------------------------|
|                              |                                        |                                   | First/Last<br>Sample<br>Date | Sample<br>Count | Median<br>SARS-CoV-2<br>RNA in gc/g<br>(IQR) | Median PMMoV<br>RNA in gc/g<br>(IQR)               | First/Last<br>Sample<br>Date | Sample<br>Count | Median<br>SARS-CoV-2<br>RNA in gc/L<br>(IQR) | Median PMMoV<br>RNA in gc/L<br>(IQR)       |
|                              | Southeast                              | 750,000                           | 2023-01-01,<br>2024-12-28    | 783             | 171576.44<br>(94258.55,<br>296840.3)         | 646146599.32<br>(480225849.67,<br>828704543.98)    | 2023-01-01,<br>2024-12-18    | 356             | 231549.83<br>(137661.28,<br>411426)          | 524266835<br>(403530802.5,<br>620779712.5) |
| San Luis Obispo<br>(281,712) | Paso Robles                            | 31,037                            | 2023-01-02,<br>2024-12-26    | 322             | 81211.42<br>(33648.46,<br>184729.82)         | 1381110110.74<br>(1069843081.79,<br>1738422973.51) |                              |                 |                                              |                                            |
|                              | City of SLO                            | 47,545                            |                              |                 |                                              |                                                    | 2023-08-07,<br>2024-12-16    | 200             | 172204.15<br>(79617.22,<br>324378.77)        | 486384030<br>(415570170,<br>553280585)     |
| San Mateo<br>(754,250)       | Pacifica                               | 40,000                            | 2023-01-02,<br>2024-05-15    | 146             | 168320.79<br>(93619.16,<br>421406.81)        | 393279242.89<br>(257756102.46,<br>560435277.66)    |                              |                 |                                              |                                            |
|                              | San Mateo                              | 150,000                           | 2023-01-02,<br>2024-06-28    | 237             | 126092.45<br>(62977.53,<br>234266.19)        | 620397382.01<br>(458338905.27,<br>800852720.94)    |                              |                 |                                              |                                            |
|                              | Half Moon Bay                          | 28,000                            | 2023-01-06,<br>2024-06-28    | 219             | 120459.28<br>(63093.76,<br>238681.4)         | 563852740.6<br>(354827289.7,<br>844358541.07)      |                              |                 |                                              |                                            |
|                              | Silicon Valley                         | 199,000                           | 2023-01-01,<br>2024-12-27    | 714             | 105090.69<br>(55997.49,<br>210689.02)        | 652775988.55<br>(481632164.08,<br>886721567.76)    |                              |                 |                                              |                                            |
| Santa Barbara<br>(445,213)   | Lompoc                                 | 69,290                            | 2023-01-03,<br>2024-12-27    | 323             | 145063.9<br>(50529.58,<br>350289.28)         | 885937068.28<br>(556015257.73,<br>1275521402.54)   |                              |                 |                                              |                                            |
|                              | El Estero                              | 77,600                            |                              |                 |                                              |                                                    | 2023-07-10,<br>2024-12-16    | 218             | 209640.15<br>(95193.65,<br>503743.92)        | 873687955<br>(710951207.5,<br>1054955365)  |
| Santa Clara<br>(1,916,831)   | Palo Alto                              | 236,000                           | 2023-01-01,<br>2024-12-28    | 796             | 174099.94<br>(93973.92,<br>299913.59)        | 810088080.45<br>(608994278.87,<br>1039593035.69)   |                              |                 |                                              |                                            |

| County<br>(Population)  | Wastewater Treatment<br>Plant Location | Population<br>Served <sup>a</sup> | Laboratory 1 (gc/g)          |                 |                                              |                                                    | Laboratory 2 (gc/L)          |                 |                                              |                                            |
|-------------------------|----------------------------------------|-----------------------------------|------------------------------|-----------------|----------------------------------------------|----------------------------------------------------|------------------------------|-----------------|----------------------------------------------|--------------------------------------------|
|                         |                                        |                                   | First/Last<br>Sample<br>Date | Sample<br>Count | Median<br>SARS-CoV-2<br>RNA in gc/g<br>(IQR) | Median PMMoV<br>RNA in gc/g<br>(IQR)               | First/Last<br>Sample<br>Date | Sample<br>Count | Median<br>SARS-CoV-2<br>RNA in gc/L<br>(IQR) | Median PMMoV<br>RNA in gc/L<br>(IQR)       |
|                         | Gilroy/Morgan Hill                     | 110,338                           | 2023-01-01,<br>2024-12-28    | 799             | 64617.43<br>(32496.93,<br>122631.35)         | 530137424.78<br>(348362477.6,<br>821330905.51)     |                              |                 |                                              |                                            |
|                         | San Jose                               | 1,500,000                         | 2023-01-01,<br>2024-12-28    | 796             | 305135.34<br>(188415.75,<br>497479.15)       | 1331738752.08<br>(1122991629.79,<br>1612340022.35) |                              |                 |                                              |                                            |
|                         | Sunnyvale                              | 153,000                           | 2023-01-01,<br>2024-12-28    | 786             | 181676.26<br>(100658.72,<br>323933.04)       | 1322551994<br>(1044704757.94,<br>1702304396.66)    |                              |                 |                                              |                                            |
| Santa Cruz<br>(268,571) | Santa Cruz City                        | 160,000                           | 2023-01-01,<br>2024-12-26    | 321             | 92680.4<br>(43939.51,<br>177543.17)          | 365937510.74<br>(272907796.96,<br>475776737.16)    |                              |                 |                                              |                                            |
|                         | Santa Cruz County                      | 160,000                           | 2023-01-01,<br>2024-06-30    | 244             | 112151.88<br>(63765.51,<br>210289.65)        | 404647031.92<br>(306938954.84,<br>509363362.64)    |                              |                 |                                              |                                            |
| Shasta (181,852)        | Redding - Clear Creek                  | 60,000                            |                              |                 |                                              |                                                    | 2023-08-21,<br>2024-12-19    | 192             | 183223.7<br>(113754.15,<br>300900.38)        | 233546810<br>(158225372.5,<br>275562767.5) |
| Solano (450,995)        | Fairfield                              | 155,000                           | 2023-01-02,<br>2024-06-28    | 247             | 94263.7<br>(55039.49,<br>165388.02)          | 813034095.52<br>(658676461.75,<br>1016803321.91)   |                              |                 |                                              |                                            |
|                         | Vallejo                                | 121,000                           | 2023-01-03,<br>2024-12-26    | 327             | 133567.4<br>(59268.15,<br>308611.51)         | 660699283.88<br>(396942262.37,<br>1019244267.51)   |                              |                 |                                              |                                            |
| Sonoma<br>(488,436)     | Petaluma                               | 65,000                            | 2023-01-03,<br>2024-05-30    | 115             | 149655.96<br>(60701.52,<br>251613.66)        | 499849623.54<br>(317832679.92,<br>739778609.3)     |                              |                 |                                              |                                            |
|                         | Santa Rosa                             | 230,000                           | 2023-01-02,<br>2024-12-25    | 316             | 114809.01<br>(65930.22,<br>206954.26)        | 1187495787.78<br>(967306523.87,<br>1531692979.87)  |                              |                 |                                              |                                            |

| County<br>(Population)  | Wastewater Treatment<br>Plant Location | Population<br>Served <sup>a</sup> | Laboratory 1 (gc/g)          |                 |                                              |                                                   | Laboratory 2 (gc/L)          |                 |                                              |                                           |
|-------------------------|----------------------------------------|-----------------------------------|------------------------------|-----------------|----------------------------------------------|---------------------------------------------------|------------------------------|-----------------|----------------------------------------------|-------------------------------------------|
|                         |                                        |                                   | First/Last<br>Sample<br>Date | Sample<br>Count | Median<br>SARS-CoV-2<br>RNA in gc/g<br>(IQR) | Median PMMoV<br>RNA in gc/g<br>(IQR)              | First/Last<br>Sample<br>Date | Sample<br>Count | Median<br>SARS-CoV-2<br>RNA in gc/L<br>(IQR) | Median PMMoV<br>RNA in gc/L<br>(IQR)      |
|                         | Windsor                                | 28,000                            | 2023-01-03,<br>2024-06-28    | 227             | 139228.49<br>(62383.63,<br>256721.19)        | 575298812.6<br>(418790459.29,<br>934048613)       |                              |                 |                                              |                                           |
| Stanislaus<br>(552,063) | Modesto                                | 230,000                           | 2023-01-03,<br>2024-06-27    | 246             | 41102.62<br>(16093.28,<br>76784.64)          | 1034368176.79<br>(751064543.34,<br>1359405888.98) |                              |                 |                                              |                                           |
|                         | Turlock                                | 86,000                            | 2023-01-02,<br>2024-12-27    | 326             | 36421.51<br>(18926.02,<br>82045.74)          | 400868367.19<br>(228991243.91,<br>614593533.39)   |                              |                 |                                              |                                           |
| Sutter (99,101)         | Yuba City                              | 70,000                            |                              |                 |                                              |                                                   | 2023-08-21,<br>2024-12-18    | 181             | 109675.1<br>(51927.1,<br>204032.6)           | 400521830<br>(344394440,<br>495486620)    |
| Ventura<br>(842,009)    | Oxnard                                 | 250,000                           |                              |                 |                                              |                                                   | 2023-06-26,<br>2024-12-17    | 221             | 112395.5<br>(62044.3,<br>242559.9)           | 1311463120<br>(1123876240,<br>1599824540) |
| Yolo (217,141)          | Davis                                  | 68,017                            | 2023-01-01,<br>2024-12-27    | 320             | 85975.81<br>(47628.67,<br>159580.1)          | 588801067.56<br>(438908252.57,<br>800637486.47)   |                              |                 |                                              |                                           |
|                         | Esparto                                | 4,006                             | 2023-01-04,<br>2024-06-28    | 238             | 48470.35<br>(21583.51,<br>102060.09)         | 906264594.13<br>(595047689.86,<br>1482015204.92)  |                              |                 |                                              |                                           |
|                         | Winters                                | 7,286                             | 2023-01-04,<br>2024-06-27    | 222             | 24041.9<br>(8969.77,<br>71935.01)            | 467026842.53<br>(323364589.25,<br>769872092.06)   |                              |                 |                                              |                                           |
|                         | Woodland                               | 59,000                            | 2023-01-02,<br>2024-12-23    | 283             | 69729.31<br>(42035.47,<br>144148.32)         | 715844184.07<br>(473174771.43,<br>1227845942.45)  |                              |                 |                                              |                                           |

<sup>a</sup> There were some differences in the reported wastewater treatment plant service population between laboratories. The service population reported here is the average population estimate of all reported population estimates for the wastewater treatment plant.

Blank cells indicate that samples from the wastewater treatment plant were not analyzed by the laboratory indicated in the column header.

Abbreviations: IQR = interquartile range, gc/g = gene copies per gram, gc/L = gene copies per liter



## Further details: California, multi-laboratory wastewater monitoring program methods

As stated in the main text, wastewater concentrations are contributed to the California, multi-laboratory monitoring program by multiple laboratories. For this analysis, we used data contributed by two distinct laboratories. The first laboratory is the same laboratory used by the national, single laboratory program; detailed methods and data are available in a data descriptor by Boehm et al. [1]. The second laboratory is the California Department of Health State Drinking Water and Radiation Laboratory (DWRL). DWRL methods for SARS-CoV-2 wastewater monitoring are described below.

DWRL monitored wastewater concentrations of SARS-CoV-2 RNA at sites during the study period. Approximately 50 mL of 24-hour composite influent wastewater samples were collected from wastewater treatment utilities using autosamplers three times per week. Samples were stored and shipped to DWRL at 4°C. The laboratory methods used by DWRL for processing wastewater samples were adapted from the methods described in Karthikeyan et al. [5].

**Concentration and Extraction.** Influent wastewater samples were mixed by inversion followed by 10 to 15 seconds of vortexing. 5 mL aliquots of mixed wastewater influent samples were concentrated in duplicate using Ceres Nanotrap® Magnetic Virus Particles (SKU# 44202). Negative concentration/extraction controls (NEC) were prepared by conducting the concentration/extraction procedure with nuclease free water to identify cross-contamination during processing. 500 µL of the concentrated wastewater samples were eluted into MagMax Microbiome Lysis Solution (Cat# A42361) in preparation for nucleic acid extraction. Prior to extraction, lysed samples were spiked with bovine coronavirus (BCoV), as positive recovery control, to a final dilution of 1 to 1,000 (or 90 copies per microliter). The KingFisher Flex and Apex were used to extract nucleic acid (NA) from 450 µL of lysed wastewater samples using the Thermo Fisher MagMAX Viral/Pathogen Nucleic Acid Isolation Kit to a final extraction volume of 50 µL. Extracts were either analyzed immediately or stored at -80°C until analysis. Extraction duplicates were stored at -80°C for long-term storage to be used for repeating analyses in the case of quality control failures or for future analyses.

**ddPCR.** NA extracts were used as a template in digital droplet RT-PCR (ddPCR) assay targeting pathogen-specific genes utilizing the primers and probes specified in **Table S3**. Pathogen targets were quantified with a four-plex assay including: SARS-CoV-2, influenza A, respiratory syncytial virus (RSV), and mpox clade II. Influenza A H5N1 (H5) was quantified as a single-plex. Concentrations of pepper mild mottle virus (PMMoV) and spiked bovine coronavirus (BCoV) were also measured. PMMoV was measured as an internal process control and an indicator of fecal strength in wastewater samples. PMMoV and BCoV were run as a duplex assay. The ddPCR reaction mix consisted of 5 µL of NA extract template, 5 µL of Bio-Rad One-Step RT-ddPCR Advanced Kit for Probes (CAT# 1864022), 2 µL of reverse transcriptase (CAT# 1864022), 1 µL of 300 mM dithiothreitol (DTT) (CAT# 1864022), and primer probe mixtures (PPMs) for each multiplexed pathogen target, to the final concentrations described in

**Table S3.** For the multiplex assay, 1.2  $\mu\text{L}$  of each of the four PPMs and 2.2  $\mu\text{L}$  of nuclease-free water were added. For the H5 singleplex assay, 2.4  $\mu\text{L}$  of the PPM and 4.6  $\mu\text{L}$  of nuclease-free water were added and 2.4  $\mu\text{L}$  of the PPMs and 2.2  $\mu\text{L}$  of nuclease-free water for the duplex assay. ddPCR was performed with the following thermal cycling protocol: reverse transcription at 50°C for 60 minutes, enzyme activation at 95°C for 10 minutes, followed by 40 two-step cycles of denaturation at 94°C for 30 seconds and anneal/extension at 57°C for 1 minute. This was followed by enzyme deactivation at 98°C for 10 minutes, droplet stabilization at 4°C for 30 minutes, and hold at 6°C. Droplets were analyzed using the QX600 droplet reader (Bio-Rad) within 48 hours after PCR, and each wastewater sample was analyzed in technical triplicate. utilizing the QX Manager Software 2.1 Standard Edition (Bio-Rad). Positive droplets were established utilizing the PTC and negative control wells for each individual target by setting a threshold according to the fluorescent amplitude. The thresholds were set where there was clear separation between the negative droplet baseline and the positive droplet population of the PTC wells. This threshold was then applied to all sample wells. Results from triplicate wells were merged by taking an arithmetic mean of the three wells. For a sample to be considered positive, the detected concentration should be above the targets' pre-determined Limits of Detection (LoDs).

**Quality Control.** Negative extraction controls were included in duplicate in each round of concentrations and extractions. PCR-positive template controls (PTC) and no-template controls (NTC) (negative PCR controls) were run in triplicate on each PCR plate along with the negative extraction controls. For quality control (QC) of ddPCR, a minimum of 10,000 droplets were required per well and a maximum of 30,000 droplets. Samples with 2 or more wells with droplet counts below 10,000 were re-run. The PCR-positive controls for each gene target are described in **Table S3**. The no-template control (NTC) consisted of nuclease free water used in place of sample extract to identify contamination during ddPCR plate preparation. If a plate did not have more than 2 droplets above the set threshold in each negative control replicate, it passed QC. If a sample did not have a clear separation between positive and negative droplets and low fluorescent amplitude due to enzyme inhibition, the sample was marked for a re-run using the extraction duplicate. For any plate that did not pass QC for NTC, PTC or the negative extraction controls, the plate was re-run. BCoV recovery rates were measured as workflow quality control metric. If a sample had a BCoV recovery rate less than 10%, it was marked for a re-run for all targets, and if an entire plate had a BCoV rate less than 30%, the entire plate was re-run for all targets.

**Data Usage Notes.** As stated in the main text, we included wastewater concentrations obtained from WWTPs. Thus, we excluded samples collected from subsewershed locations within the southeast San Francisco WWTP, Palo Alto WWTP, and San Diego WWTP as sampling was also conducted at this WWTP. We also excluded samples with reported quality control issues such as samples not being stored at the appropriate temperature. Moreover, on days when multiple SARS-CoV-2 RNA and PMMoV RNA concentrations were reported for a WWTP, we calculated the arithmetic mean of all reported PMMoV-normalized SARS-CoV-2 RNA concentrations to obtain a single normalized concentration per WWTP each day. There were also differences in WWTP service population estimates among laboratories; we additionally calculated the arithmetic mean of all reported population estimates associated with

PMMoV-normalized SARS-CoV-2 RNA concentrations to obtain a single population estimate per WWTP each day. Lastly, some SARS-CoV-2 RNA and PMMoV RNA concentrations were reported in the dataset without units. After clarification with the California Department of Public Health, we were able to assume units of gene copies per gram (gc/g) for these concentrations. All concentration units were converted to a linear scale prior to data analysis.

**Table S3: Targets Measured by the California Department of Health State Drinking Water and Radiation Laboratory**

| Target (gene)          | Positive control material                                          | Primers/Probes                                                         | Concentration |
|------------------------|--------------------------------------------------------------------|------------------------------------------------------------------------|---------------|
| SARS-CoV-2 (N)         | Parental Wuhan strain extract from live viral culture <sup>a</sup> | Forward: CAT TAC GTT TGG TGG ACC CT                                    | 450 nM        |
|                        |                                                                    | Reverse: CCT TGC CAT GTT GAG TGA GA                                    | 450 nM        |
|                        |                                                                    | Probe: /56-FAM/CG CGA TCA A/ZEN/A ACA ACG TCG G/3IABkFQ/               | 125 nM        |
| Influenza A (M)        | Influenza A extract from live viral culture <sup>a</sup>           | Forward: CAA GAC CAA TCY TGT CAC CTC TGA C                             | 450 nM        |
|                        |                                                                    | Reverse: GCA TTY TGG ACA AAV CGT CTA CG                                | 450 nM        |
|                        |                                                                    | Probe: 5'-/FAM/TGC AGT CCT /ZEN/ CGC TCA CTG GGC ACG/3IABkFQ/-3'       | 125 nM        |
| Influenza A (H5N1) (H) | IDT gBlock                                                         | Forward: TAT AGA RGG AGG ATG GCA GG                                    | 900 nM        |
|                        |                                                                    | Reverse: ACD GCC TCA AAY TGA GTG TT                                    | 900 nM        |
|                        |                                                                    | Probe: 5'-/5ATTO590N/AG GGG AGT G/TAO/G KTA CGC TGC RGA C/3IAbRQSp/-3' | 250 nM        |
| RSV (RNA polymerase)   | RSV A/B extract from live viral culture <sup>a</sup>               | Forward: GGC AAA TAT GGA AAC ATA CGT GAA                               | 450 nM        |
|                        |                                                                    | Reverse: TCT TTT TCT AGG ACA TTG TAY TGA ACA G                         | 450 nM        |
|                        |                                                                    | Probe: /5HEX/CT GTG TAT G/ZEN/T GGA GCC TTC GTG AAG CT/3IABkFQ/        | 125 nM        |

| Target (gene)       | Positive control material                                                   | Primers/Probes                                                      | Concentration |
|---------------------|-----------------------------------------------------------------------------|---------------------------------------------------------------------|---------------|
| Mpox clade II (G2R) | Mpox G2R WA clade II extract from live viral culture <sup>a</sup>           | Forward: CAC ACC GTC TCT TCC ACA GA                                 | 450 nM        |
|                     |                                                                             | Reverse: GAT ACA GGT TAA TTT CCA CAT CG                             | 450 nM        |
|                     |                                                                             | Probe: /5Cy5/AA CCC GTC G/ZEN/T AAC CAG CAA TAC ATT T/3IABkFQ/      | 125 nM        |
| Mpox clade I (E3L)  | Synthetic hMPXV 1 (Congo Basin) DNA control (Twist Bioscience, cat #106056) | Forward: TAG GCC GTG TAT CAG CAT CC                                 | 900 nM        |
|                     |                                                                             | Reverse: AGC TCT GTA TGA TCT TCA ACG T                              | 900 nM        |
|                     |                                                                             | Probe: 5'-/5HEX/CGTCGGAAC/ZEN/TGTACACCA TAGTAC/3IABkFQ/-3'          | 250 nM        |
| PMMoV               | RNA control (Promega, cat # AM2070)                                         | Forward: GAG TGG TTT GAC CTT AAC GTT TGA                            | 900 nM        |
|                     |                                                                             | Reverse: TTG TCG GTT GCA ATG CAA GT                                 | 900 nM        |
|                     |                                                                             | Probe: /5HEX/CC TAC CGA A/ZEN/G CAA ATG /3IABkFQ/                   | 250 nM        |
| BCoV                | Commercial (Merck cat #43819, 25 x 1 dose)                                  | Forward: CTG GAA GTT GGT GGA GTT                                    | 900 nM        |
|                     |                                                                             | Reverse: ATT ATC GGC CTA ACA TAC ATC                                | 900 nM        |
|                     |                                                                             | Probe: /56-FAM/CC TTC ATA T/ZEN/C TAT ACA CAT CAA GTT GTT /3IABkFQ/ | 250 nM        |

<sup>a</sup> Positive control extracted from live viral culture, provided by Viral and Rickettsial Disease Laboratory (VRDL) at California Department of Health (CDPH)

Abbreviations: BCoV = bovine coronavirus, hMPXV = human mpox virus, IDT = Integrated DNA Technologies, PMMoV = pepper mild mottle virus, RSV = respiratory syncytial virus, WA = Western Africa

## Further details: Wastewater Viral Activity Level (WVAL)

The WVAL metric is used by the US Centers for Disease Control (CDC) for the National Wastewater Surveillance System (NWSS) [6]. The WVAL value represents the number of standard deviations about a prespecified baseline, transformed to the linear scale; we calculated WVAL values based on the methodology used by CDC as of March 2025 [6]. Based on the March 2025 version of the methodology, sites must have at least 6 weeks of data in order to calculate the WVAL [6]. All WWTPs included in this analysis had at least 6 weeks of monitoring data.

**Input concentration data.** The CDC only uses normalized wastewater concentrations, preferably flow-population (“flowpop”) normalization, to compute the WVAL. For our analysis, we considered both smoothed unnormalized and smoothed PMMoV-normalized wastewater concentrations. We additionally conducted a supplementary analysis using smoothed flowpop-normalized wastewater concentrations. All input concentration data are natural log transformed prior to further calculations.

**Baseline and standard deviation calculations.** For each sampling site, the baseline is the 10th percentile of the log-transformed input concentration data within a specified time frame; the standard deviation is calculated using log-transformed input concentration data within the same time frame. For SARS-CoV-2, the CDC recalculates baselines and standard deviations every six calendar months (Jan 1 and Jul 1) using the past 12 months of data for sites with over six months of data. For sites with under six months of data, the CDC updates baselines and standard deviations until six months of data are obtained, after which baselines and standard deviations remain unchanged until the next Jan 1 or Jul 1 when baselines and standard deviations are recalculated. We conducted our analysis in a retrospective manner; therefore, we calculated the final baseline and standard deviation value for each site based on all data between 1 January 2023 to 28 December 2024. For sites with less than six months (182 days) of data, we calculated the baseline and standard deviation with all available data. For sites with greater than or equal to six months (182 days) of data but less than or equal to six months (182 days) of data from the most recent Jan 1 or Jul 1, we calculated the baseline and standard deviation with just the first six months (182 days) of data. For all other sites with greater than or equal to six months (182 days) of data, we calculated the baseline and standard deviation using just the past 365 days of data from the most recent Jan 1 or Jul 1 with reported data.

**WVAL calculation.** For each site, the number of standard deviations (SDs) that each log-transformed input concentration deviates from the baseline is first calculated as follows:  $deviation = (input\ concentration - baseline) / SD$ . This deviation value is then converted back to a linear scale to obtain the WVAL for the site:  $WVAL = e^{deviation}$ . The CDC spatial aggregates WVAL values by calculating the median value among geographies. We considered several spatial aggregation approaches as described in the main text.

# Weekly COVID-19 test positivity and wastewater SARS-CoV-2 metrics: HHS regions

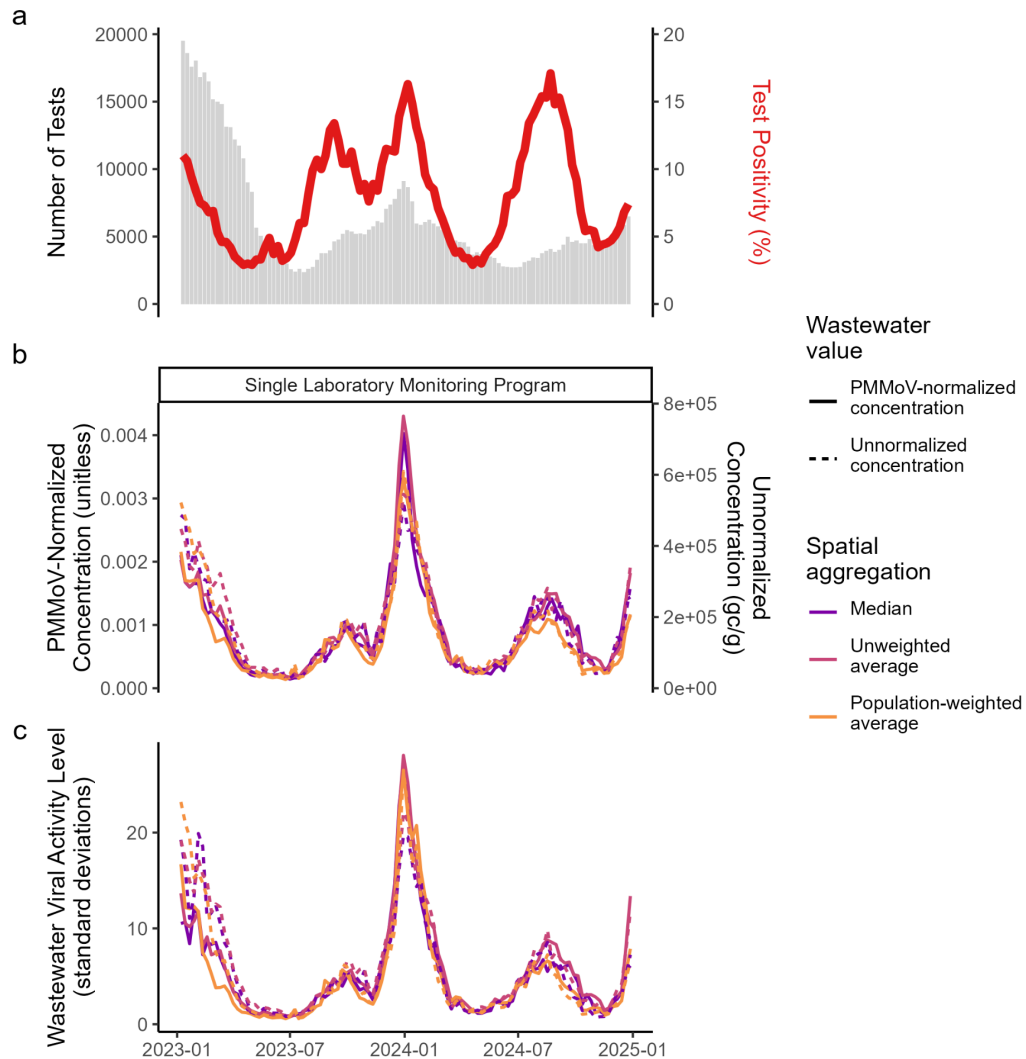

**Fig. S1 Weekly temporal correlation between COVID-19 test positivity and wastewater SARS-CoV-2 metric, HHS Region 1.** (a) COVID-19 test volume (left y-axis; gray bars) and test positivity (right y-axis; red line) from NREVSS. (b) Aggregated wastewater SARS-CoV-2 RNA concentrations (left y-axis: normalized by PMMoV; right y-axis: unnormalized) and (c) aggregated wastewater viral activity levels (calculated using PMMoV-normalized and unnormalized concentrations) using wastewater monitoring data from the single laboratory program. Solid lines represent wastewater metrics determined using PMMoV-normalized concentrations; dashed lines represent wastewater metrics determined using unnormalized concentrations. Lines are colored by spatial aggregation method (purple: median, pink: unweighted average, orange: population-weighted average). Abbreviations: gc/g = gene copies per gram, HHS = Health and Human Services, NREVSS = National Respiratory and Enteric Virus Surveillance System, PMMoV = pepper mild mottle virus.

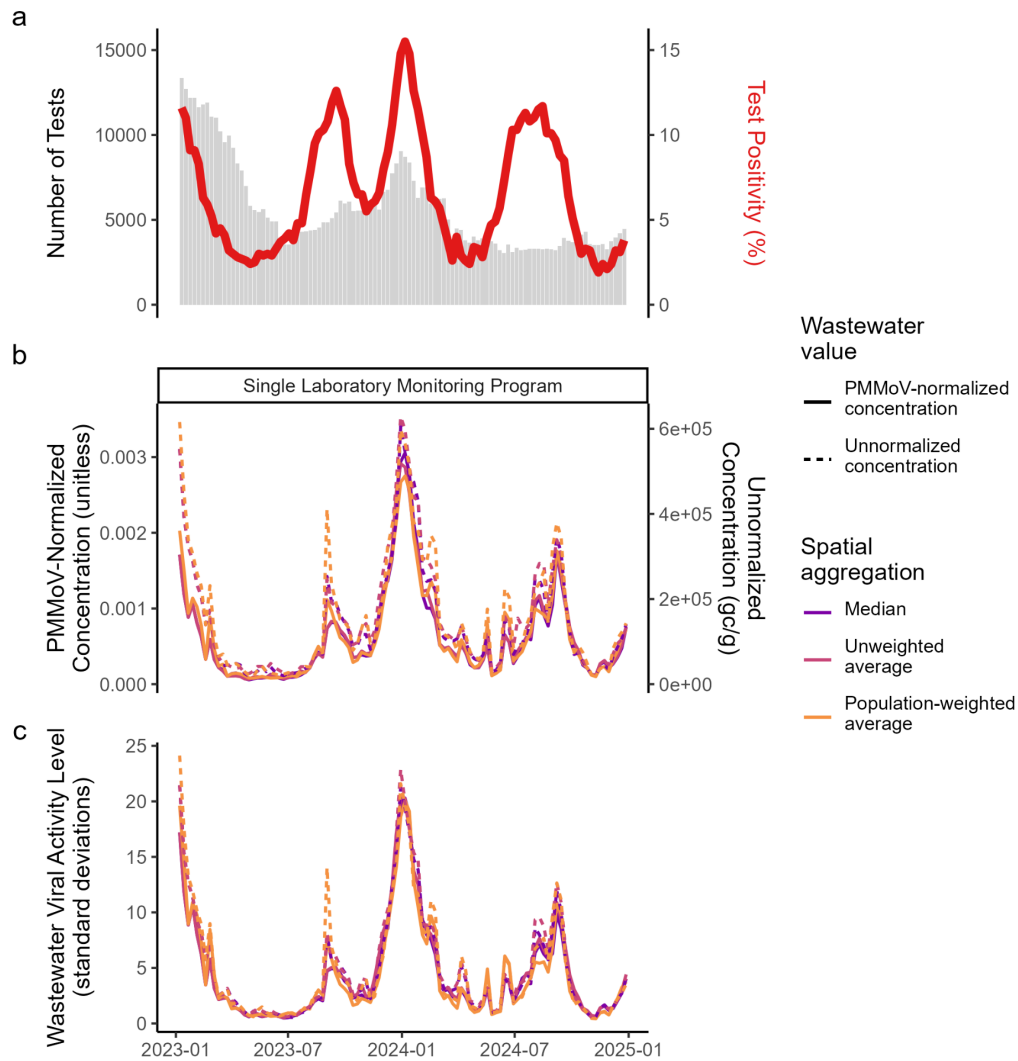

**Fig. S2 Weekly temporal correlation between COVID-19 test positivity and wastewater SARS-CoV-2 metric, HHS Region 2.** (a) COVID-19 test volume (left y-axis; gray bars) and test positivity (right y-axis; red line) from NREVSS. (b) Aggregated wastewater SARS-CoV-2 RNA concentrations (left y-axis: normalized by PMMoV; right y-axis: unnormalized) and (c) aggregated wastewater viral activity levels (calculated using PMMoV-normalized and unnormalized concentrations) using wastewater monitoring data from the single laboratory program. Solid lines represent wastewater metrics determined using PMMoV-normalized concentrations; dashed lines represent wastewater metrics determined using unnormalized concentrations. Lines are colored by spatial aggregation method (purple: median, pink: unweighted average, orange: population-weighted average). Abbreviations: gc/g = gene copies per gram, HHS = Health and Human Services, NREVSS = National Respiratory and Enteric Virus Surveillance System, PMMoV = pepper mild mottle virus.

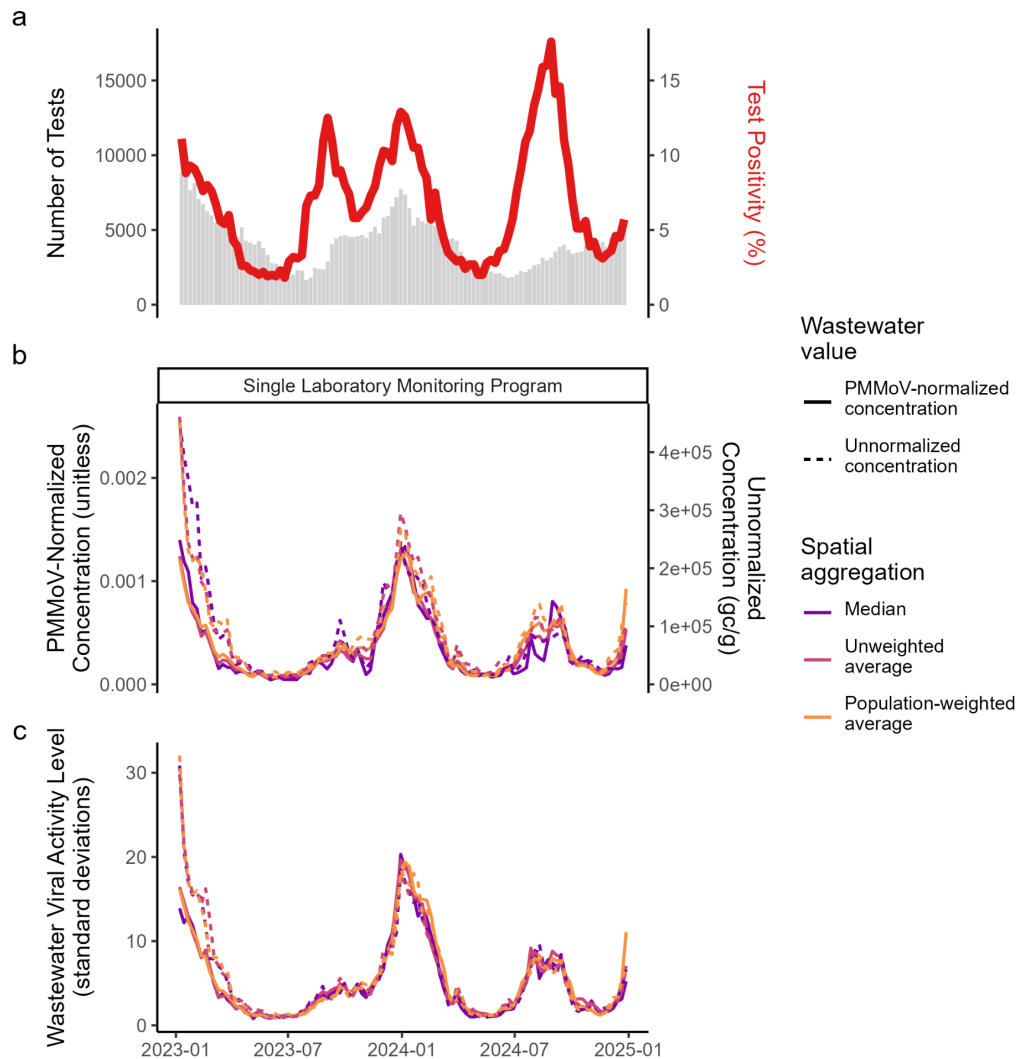

**Fig. S3 Weekly temporal correlation between COVID-19 test positivity and wastewater SARS-CoV-2 metric, HHS Region 3.** (a) COVID-19 test volume (left y-axis; gray bars) and test positivity (right y-axis; red line) from NREVSS. (b) Aggregated wastewater SARS-CoV-2 RNA concentrations (left y-axis: normalized by PMMoV; right y-axis: unnormalized) and (c) aggregated wastewater viral activity levels (calculated using PMMoV-normalized and unnormalized concentrations) using wastewater monitoring data from the single laboratory program. Solid lines represent wastewater metrics determined using PMMoV-normalized concentrations; dashed lines represent wastewater metrics determined using unnormalized concentrations. Lines are colored by spatial aggregation method (purple: median, pink: unweighted average, orange: population-weighted average). Abbreviations: gc/g = gene copies per gram, HHS = Health and Human Services, NREVSS = National Respiratory and Enteric Virus Surveillance System, PMMoV = pepper mild mottle virus.



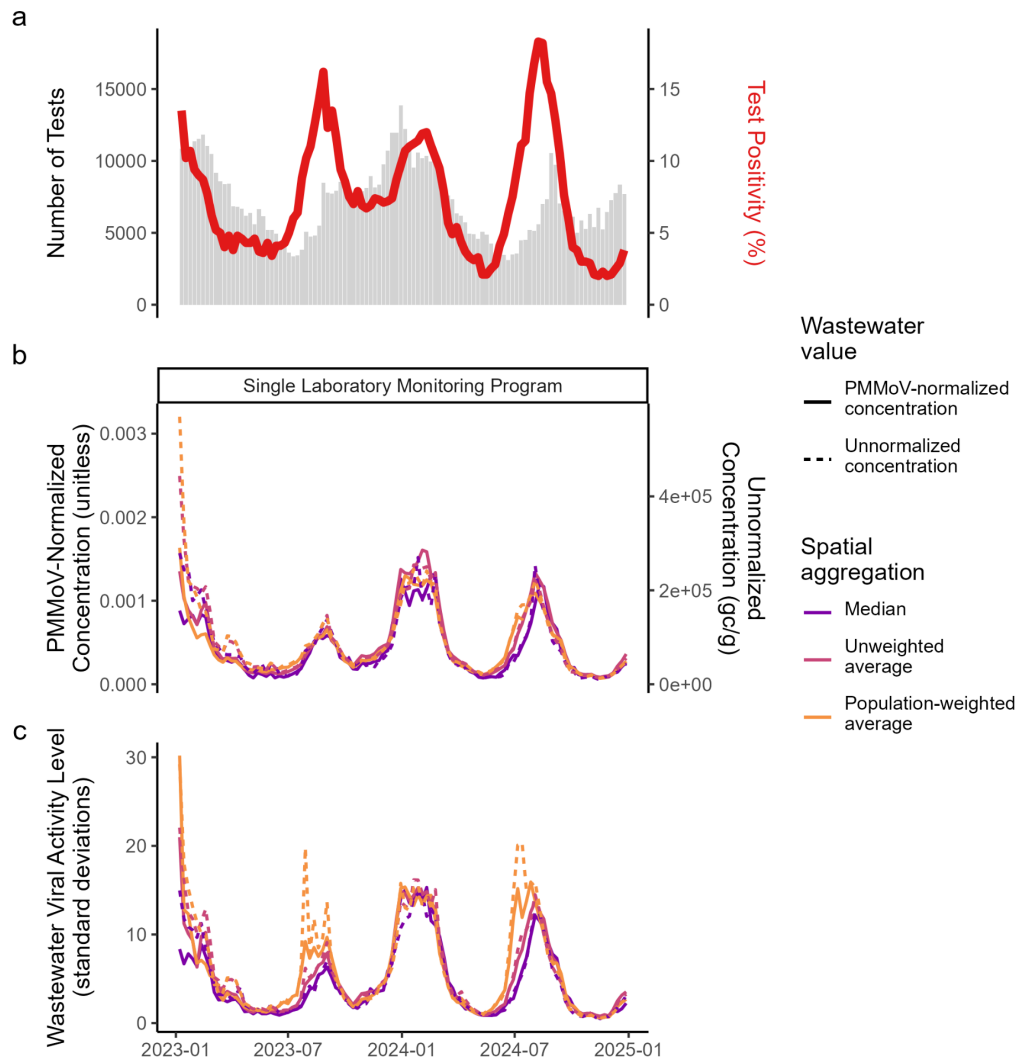

**Fig. S4 Weekly temporal correlation between COVID-19 test positivity and wastewater SARS-CoV-2 metric, HHS Region 4.** (a) COVID-19 test volume (left y-axis; gray bars) and test positivity (right y-axis; red line) from NREVSS. (b) Aggregated wastewater SARS-CoV-2 RNA concentrations (left y-axis: normalized by PMMoV; right y-axis: unnormalized) and (c) aggregated wastewater viral activity levels (calculated using PMMoV-normalized and unnormalized concentrations) using wastewater monitoring data from the single laboratory program. Solid lines represent wastewater metrics determined using PMMoV-normalized concentrations; dashed lines represent wastewater metrics determined using unnormalized concentrations. Lines are colored by spatial aggregation method (purple: median, pink: unweighted average, orange: population-weighted average). Abbreviations: gc/g = gene copies per gram, HHS = Health and Human Services, NREVSS = National Respiratory and Enteric Virus Surveillance System, PMMoV = pepper mild mottle virus.

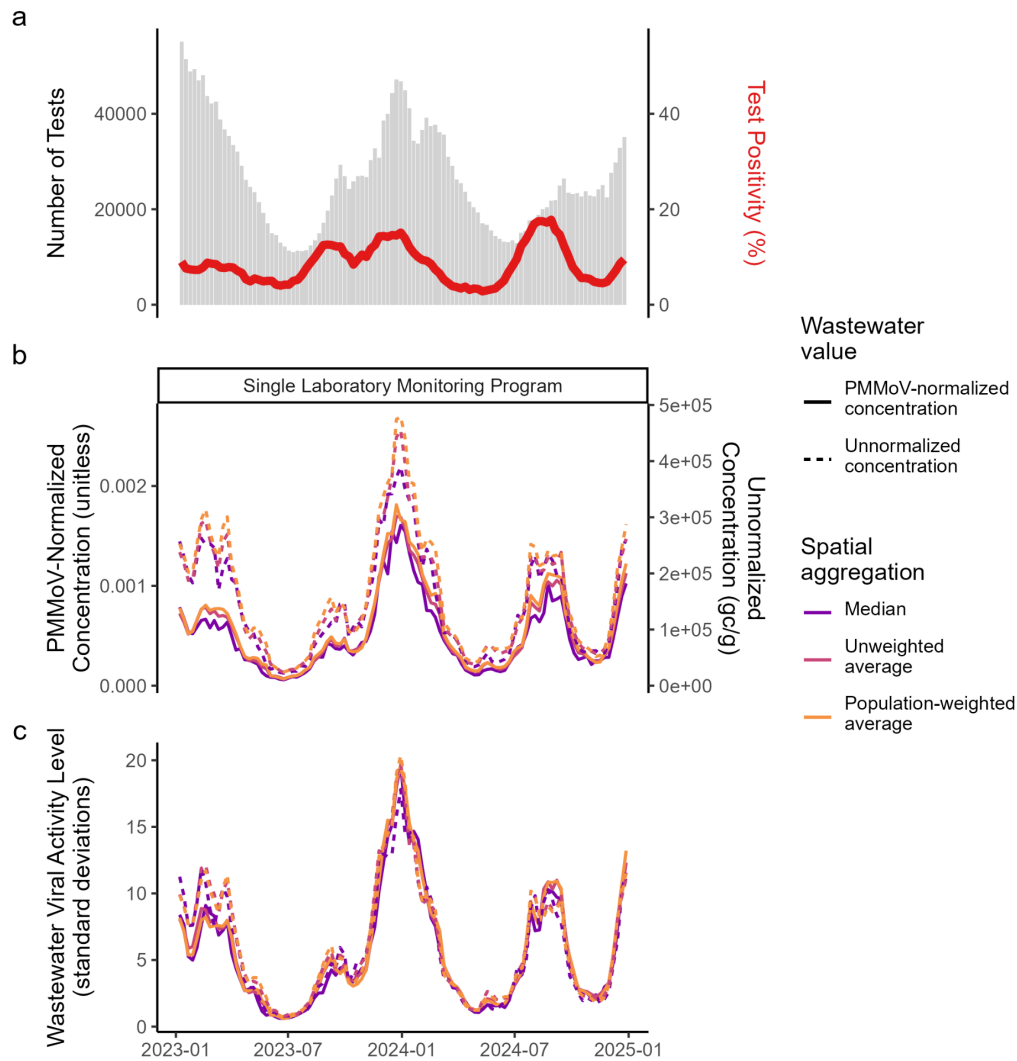

**Fig. S5 Weekly temporal correlation between COVID-19 test positivity and wastewater SARS-CoV-2 metric, HHS Region 5.** (a) COVID-19 test volume (left y-axis; gray bars) and test positivity (right y-axis; red line) from NREVSS. (b) Aggregated wastewater SARS-CoV-2 RNA concentrations (left y-axis: normalized by PMMoV; right y-axis: unnormalized) and (c) aggregated wastewater viral activity levels (calculated using PMMoV-normalized and unnormalized concentrations) using wastewater monitoring data from the single laboratory program. Solid lines represent wastewater metrics determined using PMMoV-normalized concentrations; dashed lines represent wastewater metrics determined using unnormalized concentrations. Lines are colored by spatial aggregation method (purple: median, pink: unweighted average, orange: population-weighted average). Abbreviations: gc/g = gene copies per gram, HHS = Health and Human Services, NREVSS = National Respiratory and Enteric Virus Surveillance System, PMMoV = pepper mild mottle virus.

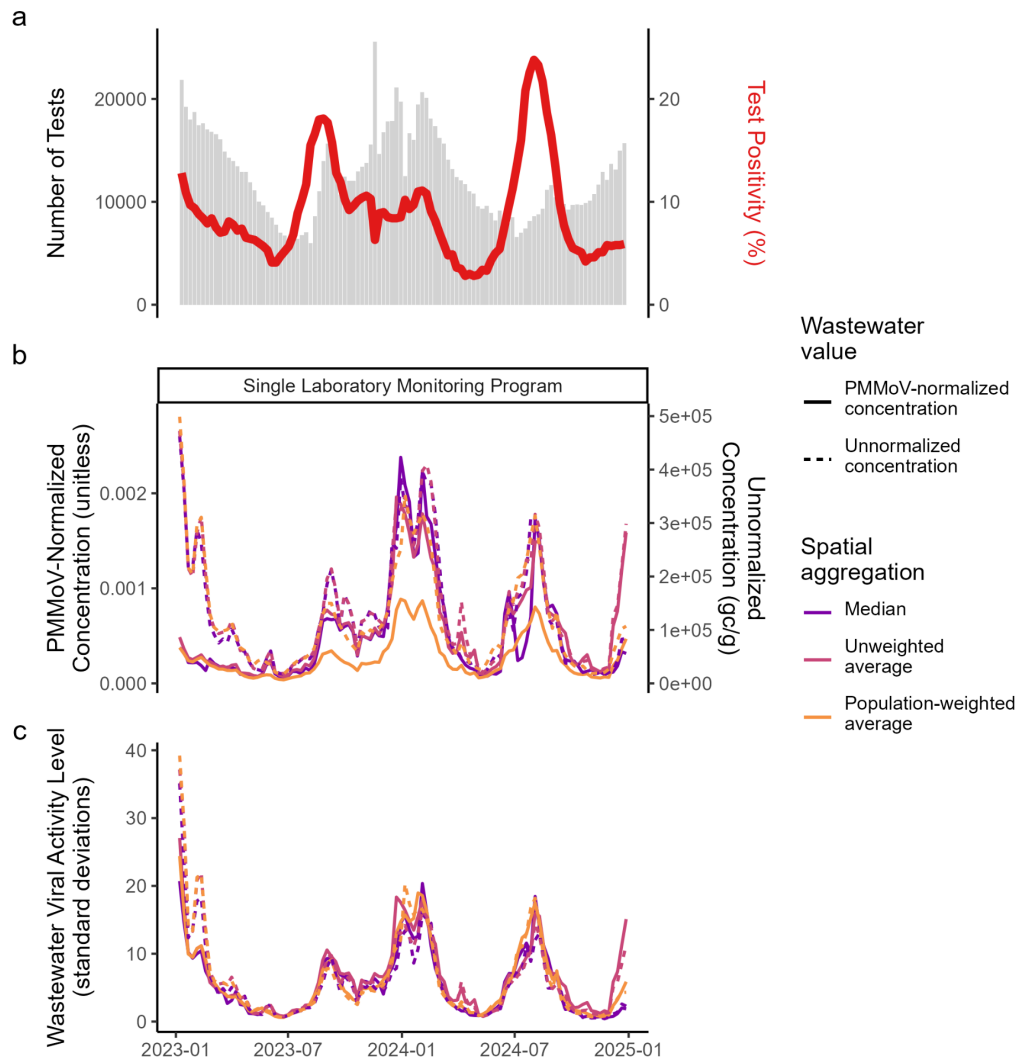

**Fig. S6 Weekly temporal correlation between COVID-19 test positivity and wastewater SARS-CoV-2 metric, HHS Region 6.** (a) COVID-19 test volume (left y-axis; gray bars) and test positivity (right y-axis; red line) from NREVSS. (b) Aggregated wastewater SARS-CoV-2 RNA concentrations (left y-axis: normalized by PMMoV; right y-axis: unnormalized) and (c) aggregated wastewater viral activity levels (calculated using PMMoV-normalized and unnormalized concentrations) using wastewater monitoring data from the single laboratory program. Solid lines represent wastewater metrics determined using PMMoV-normalized concentrations; dashed lines represent wastewater metrics determined using unnormalized concentrations. Lines are colored by spatial aggregation method (purple: median, pink: unweighted average, orange: population-weighted average). Abbreviations: gc/g = gene copies per gram, HHS = Health and Human Services, NREVSS = National Respiratory and Enteric Virus Surveillance System, PMMoV = pepper mild mottle virus.

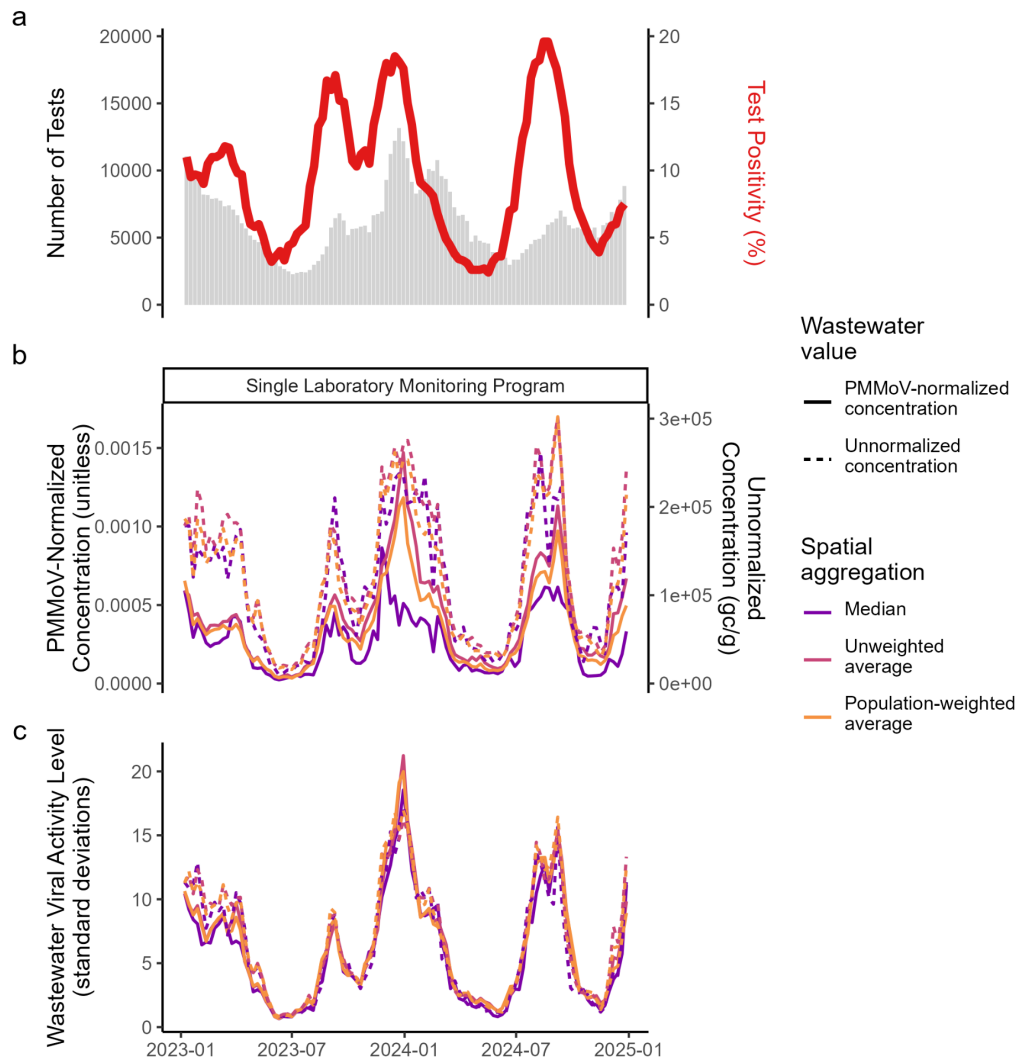

**Fig. S7 Weekly temporal correlation between COVID-19 test positivity and wastewater SARS-CoV-2 metric, HHS Region 7.** (a) COVID-19 test volume (left y-axis; gray bars) and test positivity (right y-axis; red line) from NREVSS. (b) Aggregated wastewater SARS-CoV-2 RNA concentrations (left y-axis: normalized by PMMoV; right y-axis: unnormalized) and (c) aggregated wastewater viral activity levels (calculated using PMMoV-normalized and unnormalized concentrations) using wastewater monitoring data from the single laboratory program. Solid lines represent wastewater metrics determined using PMMoV-normalized concentrations; dashed lines represent wastewater metrics determined using unnormalized concentrations. Lines are colored by spatial aggregation method (purple: median, pink: unweighted average, orange: population-weighted average). Abbreviations: gc/g = gene copies per gram, HHS = Health and Human Services, NREVSS = National Respiratory and Enteric Virus Surveillance System, PMMoV = pepper mild mottle virus.

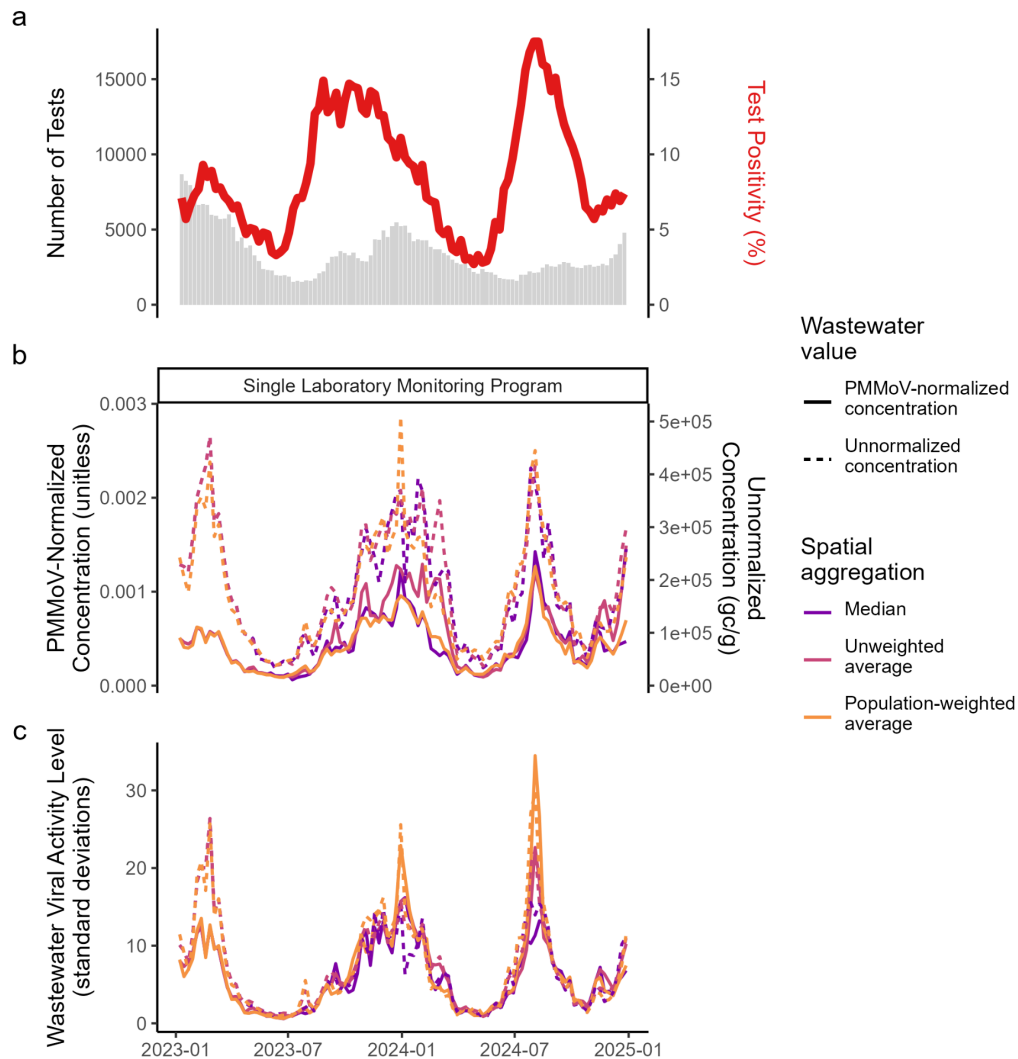

**Fig. S8 Weekly temporal correlation between COVID-19 test positivity and wastewater SARS-CoV-2 metric, HHS Region 8.** (a) COVID-19 test volume (left y-axis; gray bars) and test positivity (right y-axis; red line) from NREVSS. (b) Aggregated wastewater SARS-CoV-2 RNA concentrations (left y-axis: normalized by PMMoV; right y-axis: unnormalized) and (c) aggregated wastewater viral activity levels (calculated using PMMoV-normalized and unnormalized concentrations) using wastewater monitoring data from the single laboratory program. Solid lines represent wastewater metrics determined using PMMoV-normalized concentrations; dashed lines represent wastewater metrics determined using unnormalized concentrations. Lines are colored by spatial aggregation method (purple: median, pink: unweighted average, orange: population-weighted average). Abbreviations: gc/g = gene copies per gram, HHS = Health and Human Services, NREVSS = National Respiratory and Enteric Virus Surveillance System, PMMoV = pepper mild mottle virus.

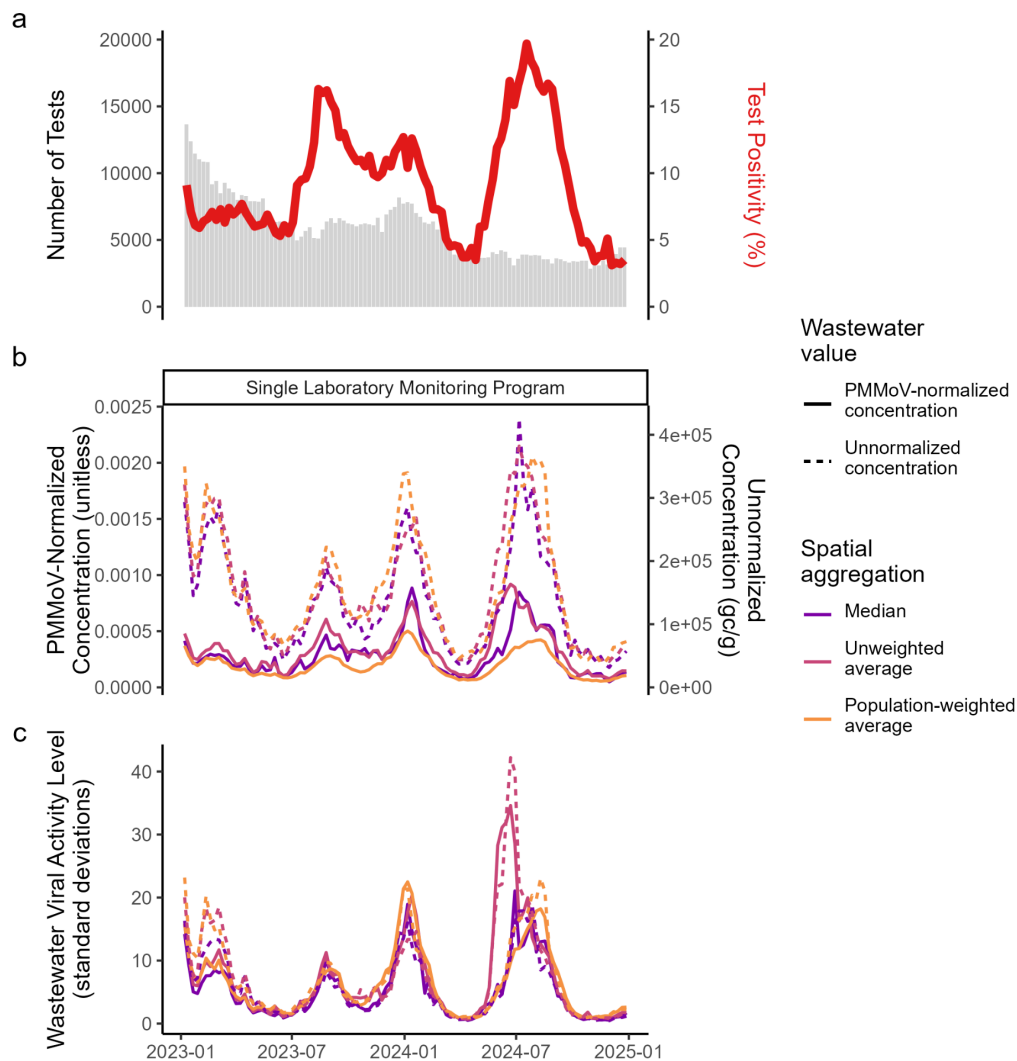

**Fig. S9 Weekly temporal correlation between COVID-19 test positivity and wastewater SARS-CoV-2 metric, HHS Region 9.** (a) COVID-19 test volume (left y-axis; gray bars) and test positivity (right y-axis; red line) from NREVSS. (b) Aggregated wastewater SARS-CoV-2 RNA concentrations (left y-axis: normalized by PMMoV; right y-axis: unnormalized) and (c) aggregated wastewater viral activity levels (calculated using PMMoV-normalized and unnormalized concentrations) using wastewater monitoring data from the single laboratory program. Solid lines represent wastewater metrics determined using PMMoV-normalized concentrations; dashed lines represent wastewater metrics determined using unnormalized concentrations. Lines are colored by spatial aggregation method (purple: median, pink: unweighted average, orange: population-weighted average). Abbreviations: gc/g = gene copies per gram, HHS = Health and Human Services, NREVSS = National Respiratory and Enteric Virus Surveillance System, PMMoV = pepper mild mottle virus.

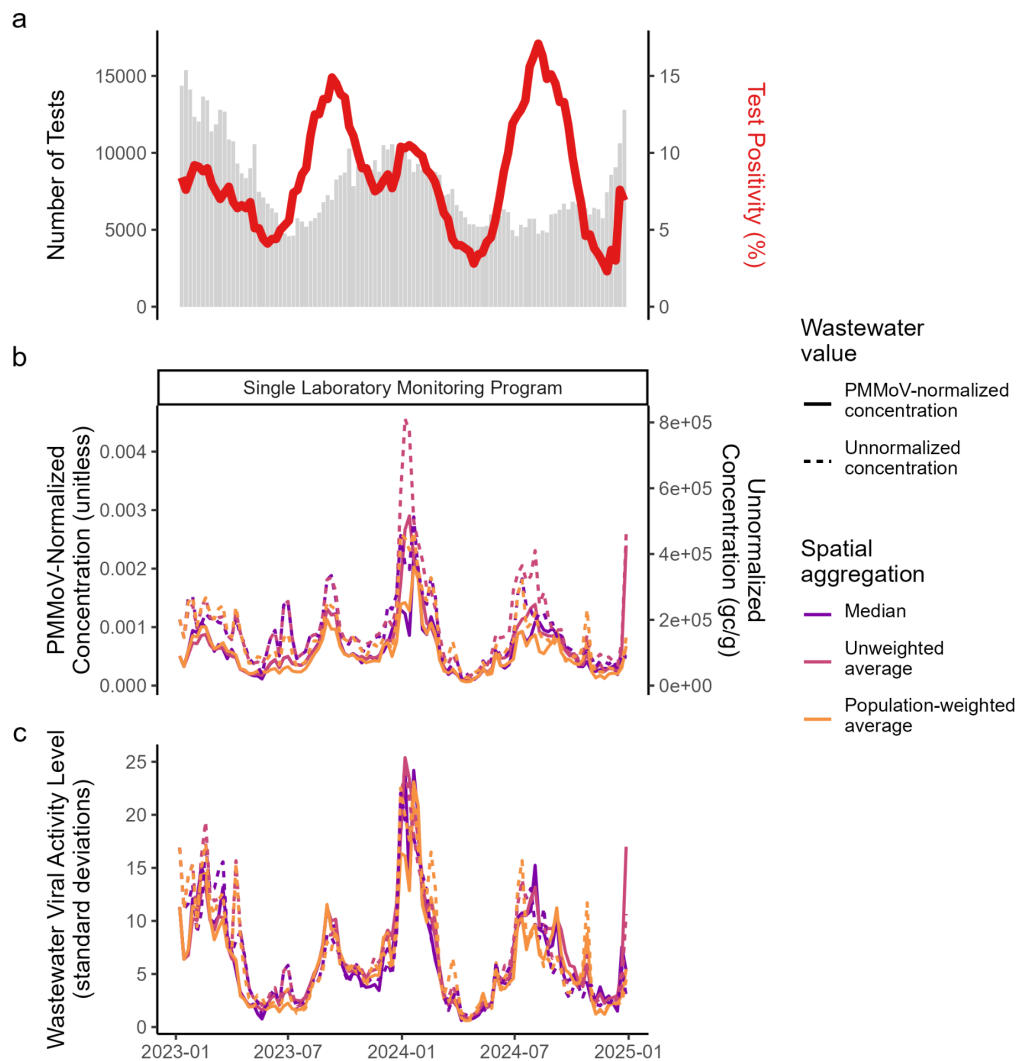

**Fig. S10 Weekly temporal correlation between COVID-19 test positivity and wastewater SARS-CoV-2 metric, HHS Region 10.** (a) COVID-19 test volume (left y-axis; gray bars) and test positivity (right y-axis; red line) from NREVSS. (b) Aggregated wastewater SARS-CoV-2 RNA concentrations (left y-axis: normalized by PMMoV; right y-axis: unnormalized) and (c) aggregated wastewater viral activity levels (calculated using PMMoV-normalized and unnormalized concentrations) using wastewater monitoring data from the single laboratory program. Solid lines represent wastewater metrics determined using PMMoV-normalized concentrations; dashed lines represent wastewater metrics determined using unnormalized concentrations. Lines are colored by spatial aggregation method (purple: median, pink: unweighted average, orange: population-weighted average). Abbreviations: gc/g = gene copies per gram, HHS = Health and Human Services, NREVSS = National Respiratory and Enteric Virus Surveillance System, PMMoV = pepper mild mottle virus.

## Kendall's tau correlation results

Kendall's tau estimates with 95% confidence intervals (CIs) and p values are shown in **Table S4** for the California spatial scale (corresponds with **Fig. 4** in the main text), **Table S5** for the HHS region spatial scale (corresponds with **Fig. 5** in the main text), and **Table S6** for the national spatial scale (corresponds with **Fig. 6** in the main text).



**Table S4. Temporal correlation between COVID-19 test positivity and SARS-CoV-2 wastewater metric: California spatial scale**

| Spatial Aggregation Method                                                | Single laboratory program |          | Multi-laboratory program |          |
|---------------------------------------------------------------------------|---------------------------|----------|--------------------------|----------|
|                                                                           | Kendall's Tau [95% CI]    | P Value  | Kendall's Tau [95% CI]   | P Value  |
| Median of unnormalized concentrations                                     | 0.58<br>[0.51, 0.65]      | < 0.0001 |                          |          |
| Median of PMMoV-normalized concentrations                                 | 0.62<br>[0.57, 0.67]      | < 0.0001 | 0.68<br>[0.63, 0.74]     | < 0.0001 |
| Unweighted average of unnormalized concentrations                         | 0.59<br>[0.51, 0.66]      | < 0.0001 |                          |          |
| Unweighted average of PMMoV-normalized concentrations                     | 0.61<br>[0.56, 0.66]      | < 0.0001 | 0.63<br>[0.57, 0.70]     | < 0.0001 |
| Population-weighted average of unnormalized concentrations                | 0.64<br>[0.57, 0.70]      | < 0.0001 |                          |          |
| Population-weighted average of PMMoV-normalized concentrations            | 0.66<br>[0.61, 0.71]      | < 0.0001 | 0.70<br>[0.65, 0.75]     | < 0.0001 |
| Median of WVAL using unnormalized concentrations                          | 0.58<br>[0.51, 0.66]      | < 0.0001 |                          |          |
| Median of WVAL using PMMoV-normalized concentrations                      | 0.64<br>[0.58, 0.70]      | < 0.0001 | 0.67<br>[0.61, 0.72]     | < 0.0001 |
| Unweighted average of WVAL using unnormalized concentrations              | 0.58<br>[0.51, 0.65]      | < 0.0001 |                          |          |
| Unweighted average of WVAL using PMMoV-normalized concentrations          | 0.62<br>[0.56, 0.67]      | < 0.0001 | 0.66<br>[0.60, 0.72]     | < 0.0001 |
| Population-weighted average of WVAL using unnormalized concentrations     | 0.62<br>[0.56, 0.69]      | < 0.0001 |                          |          |
| Population-weighted average of WVAL using PMMoV-normalized concentrations | 0.67<br>[0.61, 0.72]      | < 0.0001 | 0.69<br>[0.64, 0.74]     | < 0.0001 |

COVID-19 test positivity data for California are from CDPH. State aggregated SARS-CoV-2 wastewater metrics are from either the single laboratory monitoring program or the multi-laboratory monitoring program (indicated by column header). Spatial aggregation approaches using unnormalized concentrations were not considered when using wastewater monitoring data from the multi-laboratory monitoring program; blank cells denote no correlation was calculated.

Abbreviations: CDPH = California Department of Public Health, CI = confidence interval, PMMoV = pepper mild mottle virus, WVAL = wastewater viral activity level

**Table S5. Temporal correlation between COVID-19 test positivity and SARS-CoV-2 wastewater metric: HHS region spatial scale**

| Spatial Aggregation Method                                     | Kendall's Tau [95% CI] (P value)       |                                        |                                        |                                        |                                        |                                        |                                        |                                        |                                        |                                        |
|----------------------------------------------------------------|----------------------------------------|----------------------------------------|----------------------------------------|----------------------------------------|----------------------------------------|----------------------------------------|----------------------------------------|----------------------------------------|----------------------------------------|----------------------------------------|
|                                                                | HHS 1                                  | HHS 2                                  | HHS 3                                  | HHS 4                                  | HHS 5                                  | HHS 6                                  | HHS 7                                  | HHS 8                                  | HHS 9                                  | HHS 10                                 |
| Median of unnormalized concentrations                          | 0.49<br>[0.42, 0.57]<br>( $< 0.0001$ ) | 0.55<br>[0.47, 0.62]<br>( $< 0.0001$ ) | 0.59<br>[0.52, 0.66]<br>( $< 0.0001$ ) | 0.65<br>[0.60, 0.70]<br>( $< 0.0001$ ) | 0.53<br>[0.46, 0.60]<br>( $< 0.0001$ ) | 0.50<br>[0.43, 0.58]<br>( $< 0.0001$ ) | 0.56<br>[0.49, 0.64]<br>( $< 0.0001$ ) | 0.42<br>[0.31, 0.52]<br>( $< 0.0001$ ) | 0.54<br>[0.44, 0.64]<br>( $< 0.0001$ ) | 0.49<br>[0.40, 0.57]<br>( $< 0.0001$ ) |
| Median of PMMoV-normalized concentrations                      | 0.55<br>[0.48, 0.62]<br>( $< 0.0001$ ) | 0.56<br>[0.49, 0.63]<br>( $< 0.0001$ ) | 0.61<br>[0.54, 0.68]<br>( $< 0.0001$ ) | 0.66<br>[0.61, 0.71]<br>( $< 0.0001$ ) | 0.56<br>[0.49, 0.62]<br>( $< 0.0001$ ) | 0.43<br>[0.35, 0.51]<br>( $< 0.0001$ ) | 0.60<br>[0.53, 0.67]<br>( $< 0.0001$ ) | 0.51<br>[0.42, 0.60]<br>( $< 0.0001$ ) | 0.66<br>[0.60, 0.73]<br>( $< 0.0001$ ) | 0.59<br>[0.54, 0.65]<br>( $< 0.0001$ ) |
| Unweighted average of unnormalized concentrations              | 0.47<br>[0.39, 0.56]<br>( $< 0.0001$ ) | 0.56<br>[0.49, 0.63]<br>( $< 0.0001$ ) | 0.59<br>[0.52, 0.65]<br>( $< 0.0001$ ) | 0.65<br>[0.59, 0.71]<br>( $< 0.0001$ ) | 0.53<br>[0.47, 0.6]<br>( $< 0.0001$ )  | 0.44<br>[0.35, 0.53]<br>( $< 0.0001$ ) | 0.58<br>[0.51, 0.65]<br>( $< 0.0001$ ) | 0.41<br>[0.30, 0.52]<br>( $< 0.0001$ ) | 0.54<br>[0.44, 0.64]<br>( $< 0.0001$ ) | 0.48<br>[0.38, 0.57]<br>( $< 0.0001$ ) |
| Unweighted average of PMMoV-normalized concentrations          | 0.55<br>[0.48, 0.62]<br>( $< 0.0001$ ) | 0.56<br>[0.49, 0.63]<br>( $< 0.0001$ ) | 0.67<br>[0.61, 0.73]<br>( $< 0.0001$ ) | 0.69<br>[0.64, 0.74]<br>( $< 0.0001$ ) | 0.55<br>[0.49, 0.62]<br>( $< 0.0001$ ) | 0.39<br>[0.30, 0.47]<br>( $< 0.0001$ ) | 0.60<br>[0.52, 0.67]<br>( $< 0.0001$ ) | 0.39<br>[0.28, 0.51]<br>( $< 0.0001$ ) | 0.67<br>[0.62, 0.72]<br>( $< 0.0001$ ) | 0.59<br>[0.52, 0.65]<br>( $< 0.0001$ ) |
| Population-weighted average of unnormalized concentrations     | 0.46<br>[0.39, 0.53]<br>( $< 0.0001$ ) | 0.53<br>[0.45, 0.61]<br>( $< 0.0001$ ) | 0.59<br>[0.52, 0.66]<br>( $< 0.0001$ ) | 0.68<br>[0.63, 0.74]<br>( $< 0.0001$ ) | 0.53<br>[0.47, 0.60]<br>( $< 0.0001$ ) | 0.51<br>[0.44, 0.58]<br>( $< 0.0001$ ) | 0.61<br>[0.54, 0.68]<br>( $< 0.0001$ ) | 0.49<br>[0.39, 0.58]<br>( $< 0.0001$ ) | 0.56<br>[0.46, 0.65]<br>( $< 0.0001$ ) | 0.42<br>[0.33, 0.52]<br>( $< 0.0001$ ) |
| Population-weighted average of PMMoV-normalized concentrations | 0.55<br>[0.48, 0.62]<br>( $< 0.0001$ ) | 0.54<br>[0.47, 0.61]<br>( $< 0.0001$ ) | 0.67<br>[0.60, 0.73]<br>( $< 0.0001$ ) | 0.72<br>[0.67, 0.76]<br>( $< 0.0001$ ) | 0.55<br>[0.48, 0.62]<br>( $< 0.0001$ ) | 0.47<br>[0.39, 0.55]<br>( $< 0.0001$ ) | 0.63<br>[0.57, 0.70]<br>( $< 0.0001$ ) | 0.50<br>[0.41, 0.59]<br>( $< 0.0001$ ) | 0.62<br>[0.55, 0.69]<br>( $< 0.0001$ ) | 0.56<br>[0.48, 0.63]<br>( $< 0.0001$ ) |
| Median of WVAL using unnormalized concentrations               | 0.45<br>[0.37, 0.53]<br>( $< 0.0001$ ) | 0.53<br>[0.45, 0.60]<br>( $< 0.0001$ ) | 0.61<br>[0.55, 0.67]<br>( $< 0.0001$ ) | 0.66<br>[0.61, 0.71]<br>( $< 0.0001$ ) | 0.53<br>[0.47, 0.60]<br>( $< 0.0001$ ) | 0.52<br>[0.45, 0.60]<br>( $< 0.0001$ ) | 0.55<br>[0.48, 0.62]<br>( $< 0.0001$ ) | 0.45<br>[0.35, 0.56]<br>( $< 0.0001$ ) | 0.53<br>[0.43, 0.63]<br>( $< 0.0001$ ) | 0.44<br>[0.35, 0.54]<br>( $< 0.0001$ ) |
| Median of WVAL using PMMoV-normalized concentrations           | 0.52<br>[0.44, 0.59]<br>( $< 0.0001$ ) | 0.56<br>[0.49, 0.63]<br>( $< 0.0001$ ) | 0.67<br>[0.61, 0.73]<br>( $< 0.0001$ ) | 0.68<br>[0.64, 0.73]<br>( $< 0.0001$ ) | 0.55<br>[0.49, 0.62]<br>( $< 0.0001$ ) | 0.57<br>[0.51, 0.64]<br>( $< 0.0001$ ) | 0.59<br>[0.52, 0.67]<br>( $< 0.0001$ ) | 0.47<br>[0.38, 0.56]<br>( $< 0.0001$ ) | 0.59<br>[0.51, 0.67]<br>( $< 0.0001$ ) | 0.52<br>[0.45, 0.6]<br>( $< 0.0001$ )  |

| Spatial Aggregation Method                                                | Kendall's Tau [95% CI] (P value)       |                                        |                                        |                                        |                                        |                                        |                                        |                                        |                                        |                                        |
|---------------------------------------------------------------------------|----------------------------------------|----------------------------------------|----------------------------------------|----------------------------------------|----------------------------------------|----------------------------------------|----------------------------------------|----------------------------------------|----------------------------------------|----------------------------------------|
|                                                                           | HHS 1                                  | HHS 2                                  | HHS 3                                  | HHS 4                                  | HHS 5                                  | HHS 6                                  | HHS 7                                  | HHS 8                                  | HHS 9                                  | HHS 10                                 |
| Unweighted average of WVAL using unnormalized concentrations              | 0.46<br>[0.37, 0.54]<br>( $< 0.0001$ ) | 0.54<br>[0.47, 0.62]<br>( $< 0.0001$ ) | 0.60<br>[0.54, 0.66]<br>( $< 0.0001$ ) | 0.65<br>[0.60, 0.71]<br>( $< 0.0001$ ) | 0.53<br>[0.47, 0.59]<br>( $< 0.0001$ ) | 0.44<br>[0.35, 0.53]<br>( $< 0.0001$ ) | 0.57<br>[0.50, 0.64]<br>( $< 0.0001$ ) | 0.47<br>[0.36, 0.57]<br>( $< 0.0001$ ) | 0.53<br>[0.43, 0.62]<br>( $< 0.0001$ ) | 0.44<br>[0.34, 0.53]<br>( $< 0.0001$ ) |
| Unweighted average of WVAL using PMMoV-normalized concentrations          | 0.55<br>[0.47, 0.62]<br>( $< 0.0001$ ) | 0.56<br>[0.49, 0.63]<br>( $< 0.0001$ ) | 0.67<br>[0.61, 0.73]<br>( $< 0.0001$ ) | 0.68<br>[0.64, 0.73]<br>( $< 0.0001$ ) | 0.57<br>[0.51, 0.63]<br>( $< 0.0001$ ) | 0.47<br>[0.38, 0.55]<br>( $< 0.0001$ ) | 0.59<br>[0.52, 0.66]<br>( $< 0.0001$ ) | 0.47<br>[0.37, 0.56]<br>( $< 0.0001$ ) | 0.58<br>[0.50, 0.66]<br>( $< 0.0001$ ) | 0.53<br>[0.45, 0.61]<br>( $< 0.0001$ ) |
| Population-weighted average of WVAL using unnormalized concentrations     | 0.55<br>[0.48, 0.61]<br>( $< 0.0001$ ) | 0.54<br>[0.48, 0.61]<br>( $< 0.0001$ ) | 0.64<br>[0.57, 0.71]<br>( $< 0.0001$ ) | 0.71<br>[0.66, 0.76]<br>( $< 0.0001$ ) | 0.57<br>[0.51, 0.62]<br>( $< 0.0001$ ) | 0.56<br>[0.50, 0.63]<br>( $< 0.0001$ ) | 0.61<br>[0.54, 0.67]<br>( $< 0.0001$ ) | 0.52<br>[0.43, 0.61]<br>( $< 0.0001$ ) | 0.58<br>[0.51, 0.65]<br>( $< 0.0001$ ) | 0.50<br>[0.42, 0.58]<br>( $< 0.0001$ ) |
| Population-weighted average of WVAL using PMMoV-normalized concentrations | 0.45<br>[0.37, 0.52]<br>( $< 0.0001$ ) | 0.54<br>[0.46, 0.61]<br>( $< 0.0001$ ) | 0.57<br>[0.50, 0.63]<br>( $< 0.0001$ ) | 0.66<br>[0.61, 0.72]<br>( $< 0.0001$ ) | 0.54<br>[0.47, 0.60]<br>( $< 0.0001$ ) | 0.51<br>[0.44, 0.59]<br>( $< 0.0001$ ) | 0.58<br>[0.52, 0.65]<br>( $< 0.0001$ ) | 0.52<br>[0.42, 0.61]<br>( $< 0.0001$ ) | 0.54<br>[0.44, 0.63]<br>( $< 0.0001$ ) | 0.40<br>[0.30, 0.50]<br>( $< 0.0001$ ) |

COVID-19 test positivity data for each HHS region are from NREVSS. Regionally aggregated SARS-CoV-2 wastewater metrics are from the single laboratory monitoring program.

Abbreviations: CI = confidence interval, HHS = Health and Human Services, NREVSS = National Respiratory and Enteric Virus Surveillance System, PMMoV = pepper mild mottle virus, WVAL = wastewater viral activity level

**Table S6. Temporal correlation between COVID-19 test positivity and SARS-CoV-2 wastewater metric: USA spatial scale**

| <b>Spatial Aggregation Method</b>                                         | <b>Kendall's Tau<br/>[95% CI]</b> | <b>P Value</b> |
|---------------------------------------------------------------------------|-----------------------------------|----------------|
| Median of unnormalized concentrations                                     | 0.54<br>[0.47, 0.61]              | < 0.0001       |
| Median of PMMoV-normalized concentrations                                 | 0.58<br>[0.52, 0.64]              | < 0.0001       |
| Unweighted average of unnormalized concentrations                         | 0.53<br>[0.46, 0.61]              | < 0.0001       |
| Unweighted average of PMMoV-normalized concentrations                     | 0.57<br>[0.50, 0.63]              | < 0.0001       |
| Population-weighted average of unnormalized concentrations                | 0.56<br>[0.50, 0.63]              | < 0.0001       |
| Population-weighted average of PMMoV-normalized concentrations            | 0.59<br>[0.53, 0.64]              | < 0.0001       |
| Median of WVAL using unnormalized concentrations                          | 0.53<br>[0.47, 0.60]              | < 0.0001       |
| Median of WVAL using PMMoV-normalized concentrations                      | 0.57<br>[0.51, 0.63]              | < 0.0001       |
| Unweighted average of WVAL using unnormalized concentrations              | 0.52<br>[0.45, 0.60]              | < 0.0001       |
| Unweighted average of WVAL using PMMoV-normalized concentrations          | 0.57<br>[0.51, 0.63]              | < 0.0001       |
| Population-weighted average of WVAL using unnormalized concentrations     | 0.57<br>[0.50, 0.64]              | < 0.0001       |
| Population-weighted average of WVAL using PMMoV-normalized concentrations | 0.62<br>[0.57, 0.68]              | < 0.0001       |

COVID-19 test positivity data for the USA are from NREVSS. Nationally aggregated SARS-CoV-2 wastewater metrics are from the single laboratory monitoring program.

Abbreviations: CI = confidence interval, PMMoV = pepper mild mottle virus, NREVSS = National Respiratory and Enteric Virus Surveillance System, WVAL = wastewater viral activity level

## Supplementary analysis: Flowpop normalization

Normalizing wastewater concentrations by flow rate and population (“flowpop”) is an alternative normalization technique used by some wastewater monitoring programs. The multi-laboratory program includes some WWTPs reporting flow rate measurements, so we conducted a supplementary analysis using flowpop-normalized input wastewater values [3]. In total, 29 WWTPs spanning 24 unique counties reported flow rate in units of millions of gallons per day (MGD) during the study period. Samples collected from these WWTPs all reported SARS-CoV-2 RNA concentrations in units of gene copies per liter (gc/L). We normalized concentrations by flow and population as shown below.

*normalized concentration [gc/d/person] =*

$$\frac{\text{concentration [gc/L]} * \text{flow rate [MGD]}}{\text{population served [persons]}} * 3.78541 \text{ [L/gal]} * 10^6 \text{ [gal/million gal]}$$

We further prepared and spatially aggregated flowpop-normalized concentrations as described in the main text. This supplementary analysis was only conducted at the California spatial scale using data from the multi-laboratory monitoring program as the single laboratory program does not report flow rate. Weekly SARS-CoV-2 wastewater metrics determined using flowpop-normalized input wastewater values and spatially aggregated for California are shown in **Fig. S11**. Results from Kendall’s tau correlation between COVID-19 test positivity and each SARS-CoV-2 wastewater metric are reported in **Table S7**.

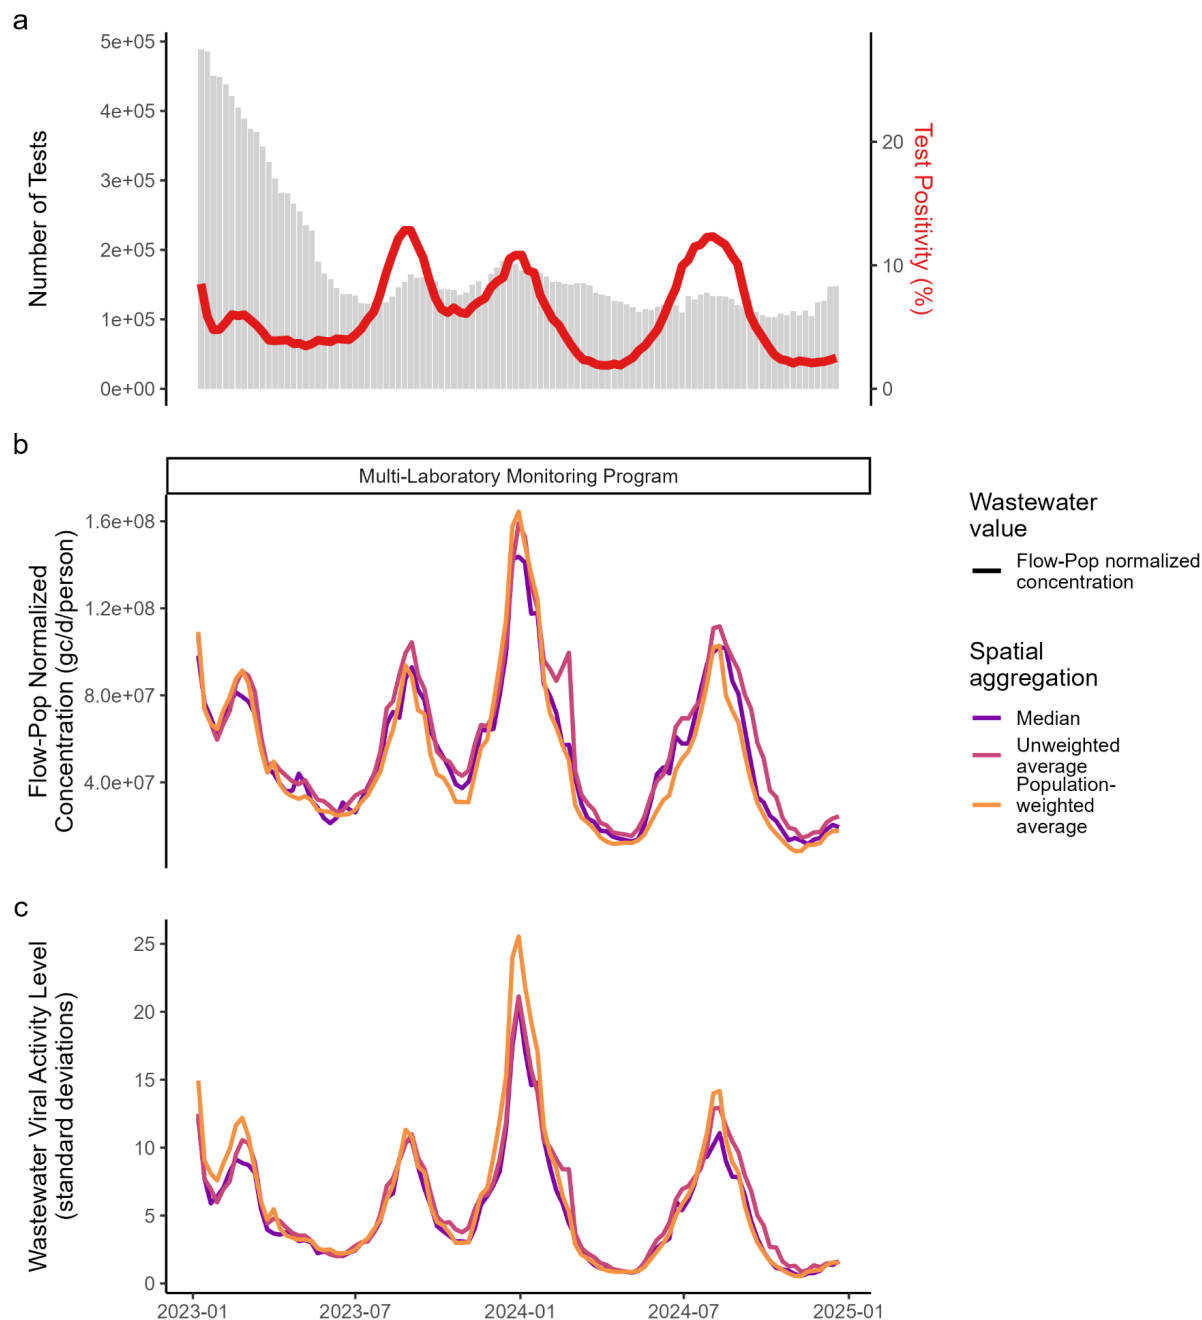

**Fig. S11 Weekly temporal correlation between COVID-19 test positivity and wastewater SARS-CoV-2 metric, California spatial scale.** (a) California COVID-19 test volume (left y-axis; gray bars) and test positivity (right y-axis; red line) from CDPH. (b) State aggregated wastewater SARS-CoV-2 RNA concentrations (flowpop-normalized concentrations only) and (c) state aggregated wastewater viral activity levels (calculated using flowpop-normalized concentrations only) using wastewater monitoring data from the multi-laboratory program. Lines are colored by spatial aggregation method (purple: median, pink: unweighted average, orange: population-weighted average). Abbreviations: CDPH = California Department of Public Health, gc/d/person = gene copies per day per person.

**Table S7. Temporal correlation between COVID-19 test positivity and SARS-CoV-2 wastewater metric: California spatial scale with flowpop normalization**

| <b>Spatial Aggregation Method</b>                                           | <b>Kendall's Tau [95% CI]</b> | <b>P Value</b> |
|-----------------------------------------------------------------------------|-------------------------------|----------------|
| Median of flowpop-normalized concentrations                                 | 0.71<br>[0.66, 0.75]          | < 0.0001       |
| Unweighted average of flowpop-normalized concentrations                     | 0.71<br>[0.65, 0.76]          | < 0.0001       |
| Population-weighted average of flowpop-normalized concentrations            | 0.67<br>[0.62, 0.73]          | < 0.0001       |
| Median of WVAL using flowpop-normalized concentrations                      | 0.69<br>[0.65, 0.74]          | < 0.0001       |
| Unweighted average of WVAL using flowpop-normalized concentrations          | 0.70<br>[0.65, 0.76]          | < 0.0001       |
| Population-weighted average of WVAL using flowpop-normalized concentrations | 0.67<br>[0.62, 0.72]          | < 0.0001       |

COVID-19 test positivity data for California from CDPH. State aggregated SARS-CoV-2 wastewater metrics from the multi-laboratory monitoring program.

Abbreviations: CDPH = California Department of Public Health, CI = confidence interval, WVAL = wastewater viral activity level, WWTP = wastewater treatment plant

# References

1. Boehm AB, Wolfe MK, Bidwell AL, Zulli A, Chan-Herur V, White BJ, Sheldon B, Duong D. Human pathogen nucleic acids in wastewater solids from 191 wastewater treatment plants in the United States. *Sci Data*. 2024 Oct 17;11(1):1141.
2. U.S. Census Bureau, Population Division. Annual Estimates of the Resident Population for the United States, Regions, States, District of Columbia, and Puerto Rico: April 1, 2020 to July 1, 2023 (NST-EST2023-POP) [Internet]. United States Census Bureau; 2023 [cited 2024 Apr 2]. Available from: <https://www.census.gov/data/tables/time-series/demo/popest/2020s-state-total.html>
3. California Department of Public Health. CDPH-Wastewater Surveillance Data, California [Internet]. California Health and Human Services Open Data Portal. [cited 2025 Mar 10]. Available from: <https://data.chhs.ca.gov/dataset/wastewater-surveillance-data-california>
4. U.S. Census Bureau. 2018-2022 American Community Survey 5-Year Data [Internet]. [cited 2025 Feb 24]. Available from: <https://www.census.gov/programs-surveys/acs/data.html>
5. Karthikeyan S, Ronquillo N, Belda-Ferre P, Alvarado D, Javidi T, Longhurst CA, Knight R. High-Throughput Wastewater SARS-CoV-2 Detection Enables Forecasting of Community Infection Dynamics in San Diego County. *mSystems*. 2021 Mar 2;6(2):10.1128/msystems.00045-21.
6. U.S. Centers for Disease Control and Prevention. About Wastewater Data [Internet]. Centers for Disease Control and Prevention. 2025 [cited 2025 Mar 12]. Available from: <https://www.cdc.gov/nwss/about-data.html>
